# Supplementary material for: On resin synthesis of phosphoethanolamine cellulose
Source: Royal Society of Chemistry journal article supplement (doi:10.1039/d4ob01121j), 2024-01-01
Supplement: d4ob01121j1.pdf [file d4ob01121j1.pdf]

## Supplementary information

### On resin synthesis of phosphoethanolamine cellulose

Jhih-Yi Huang<sup>a,b</sup> and Martina Delbianco<sup>\*a</sup>

a. Department of Biomolecular Systems, Max Planck Institute of Colloids and Interfaces, Am Mühlenberg 1, 14476 Potsdam, Germany.

b. Department of Chemistry and Biochemistry, Freie Universität Berlin, Arnimallee 22, 14195 Berlin, Germany.

## Table of Contents

|       |                                                                         |           |
|-------|-------------------------------------------------------------------------|-----------|
| 1.    | CHEMICAL SYNTHESIS .....                                                | 3         |
| 2.    | BUILDING BLOCKS FOR AGA.....                                            | 4         |
| 3.    | AUTOMATED GLYCAN ASSEMBLY .....                                         | 5         |
| 3.1   | GENERAL MATERIALS AND METHODS .....                                     | 5         |
| 3.2   | PREPARATION OF STOCK SOLUTIONS .....                                    | 5         |
| 3.3   | MODULES FOR AUTOMATED SYNTHESIS .....                                   | 5         |
|       | <i>Module A: Resin preparation.....</i>                                 | <i>5</i>  |
|       | <i>Module B: Acidic wash with TMSOTf solution (20 min).....</i>         | <i>5</i>  |
|       | <i>Module C1: Thioglycoside glycosylation (35 min).....</i>             | <i>6</i>  |
|       | <i>Module C2: Glycosyl phosphate glycosylation (45 min).....</i>        | <i>6</i>  |
|       | <i>Module D: Capping (30 min).....</i>                                  | <i>7</i>  |
|       | <i>Module E1: Fmoc deprotection (9 min).....</i>                        | <i>7</i>  |
|       | <i>Module E2: Lev deprotection (90 min).....</i>                        | <i>8</i>  |
| 3.4   | POST-AGA MANIPULATIONS.....                                             | 9         |
|       | <i>Module F1: On-resin phosphorylation using H-phosphonate 4.....</i>   | <i>9</i>  |
|       | <i>Module F2: On-resin phosphorylation using phosphoramidite 5.....</i> | <i>9</i>  |
|       | <i>Module G: On-resin methanolysis .....</i>                            | <i>10</i> |
|       | <i>Module H1: Cleavage from solid support.....</i>                      | <i>10</i> |
|       | <i>Module H2: Micro-cleavage from solid support.....</i>                | <i>10</i> |
|       | <i>Module I: Hydrogenolysis at ambient pressure.....</i>                | <i>10</i> |
|       | <i>Module J: Purification.....</i>                                      | <i>10</i> |
| 3.5   | CHARACTERIZATION OF PHOSPHORYLATING REAGENT 4 AND 5.....                | 12        |
| 4.    | OLIGOSACCHARIDE SYNTHESIS.....                                          | 14        |
| 4.1   | OPTIMIZATION OF SOLID-PHASE SYNTHESIS OF PETN-MODIFIED GLUCOSIDE P..... | 15        |
| 4.1.1 | <i>Mass spectrometry and additional information .....</i>               | <i>16</i> |
|       | <i>Analysis of intermediate 7.....</i>                                  | <i>16</i> |
|       | <i>Analysis of intermediate 8.....</i>                                  | <i>17</i> |
|       | <i>Analysis of the intermediate 9.....</i>                              | <i>18</i> |
|       | <i>Analysis of the intermediate 10.....</i>                             | <i>19</i> |
| 4.2   | SYNTHESIS OF P.....                                                     | 20        |
| 4.3   | SYNTHESIS OF PAP .....                                                  | 22        |
| 4.4   | SYNTHESIS OF PA <sub>5</sub> .....                                      | 25        |
| 4.5   | SYNTHESIS OF A <sub>3</sub> PA <sub>2</sub> .....                       | 28        |
| 4.6   | SYNTHESIS OF APA <sub>4</sub> .....                                     | 31        |
| 4.7   | SYNTHESIS OF A <sub>3</sub> P.....                                      | 34        |
| 4.8   | SYNTHESIS OF A <sub>2</sub> PA <sub>3</sub> .....                       | 37        |
| 4.9   | SYNTHESIS OF APA <sub>2</sub> PA .....                                  | 40        |
| 4.10  | SYNTHESIS OF APA <sub>3</sub> P.....                                    | 44        |
| 4.11  | SYNTHESIS OF (AP) <sub>3</sub> .....                                    | 48        |
| 5.    | REFERENCES .....                                                        | 52        |

## 1. Chemical synthesis

All chemicals used were reagent grade and used as supplied unless otherwise noted. The automated syntheses were performed on a home-built synthesizer developed at the Max Planck Institute of Colloids and Interfaces<sup>1</sup>, or the commercial synthesizer Glyconeer 3.1 (GlycoUniverse, Germany). Analytical thin-layer chromatography (TLC) was performed on Merck silica gel 60 F254 plates (0.25 mm). Compounds were visualized by UV irradiation or dipping the plate in a staining solution (sugar stain: 10% H<sub>2</sub>SO<sub>4</sub> in EtOH; CAM: 48 g/L ammonium molybdate, 60 g/L ceric ammonium molybdate in 6% H<sub>2</sub>SO<sub>4</sub> aqueous solution). Flash column chromatography was carried out by using forced flow of the indicated solvent on Fluka Kieselgel 60 M (0.04 – 0.063 mm). Analysis and purification by reverse phase HPLC was performed by using an Agilent 1260 series equipped with an evaporative light scattering detector (ELSD). Products were lyophilized using a Christ Alpha 2-4 LD plus freeze dryer. <sup>1</sup>H, <sup>13</sup>C, <sup>31</sup>P and HSQC NMR spectra were recorded on a Bruker 400-MR (400 MHz), Varian 600-MR (600 MHz), or Bruker Biospin AVANCE700 (700 MHz) spectrometer. Spectra were recorded in CDCl<sub>3</sub> or D<sub>2</sub>O using the solvent as the internal standard in <sup>1</sup>H NMR (CDCl<sub>3</sub>: 7.26 ppm <sup>1</sup>H, D<sub>2</sub>O: 4.79 ppm <sup>1</sup>H). The <sup>1</sup>H NMR were acquired without heteroatom decoupling. The <sup>13</sup>C and <sup>31</sup>P were acquired with hydrogen atom decoupling. <sup>1</sup>H NMR integrals of the resonances corresponding to residues at the reducing end are reported as non-integer numbers and the sum of the integrals of  $\alpha$  and  $\beta$  anomers is set to 1. NMR spectra were processed using MestreNova 14.3 (MestreLab Research). High resolution mass spectra were obtained using a 6210 ESI-TOF mass spectrometer (Agilent) and a MALDI-TOF autoflex™ (Bruker). MALDI and ESI mass spectra were run on IonSpec Ultima instruments.

## 2. Building blocks for AGA

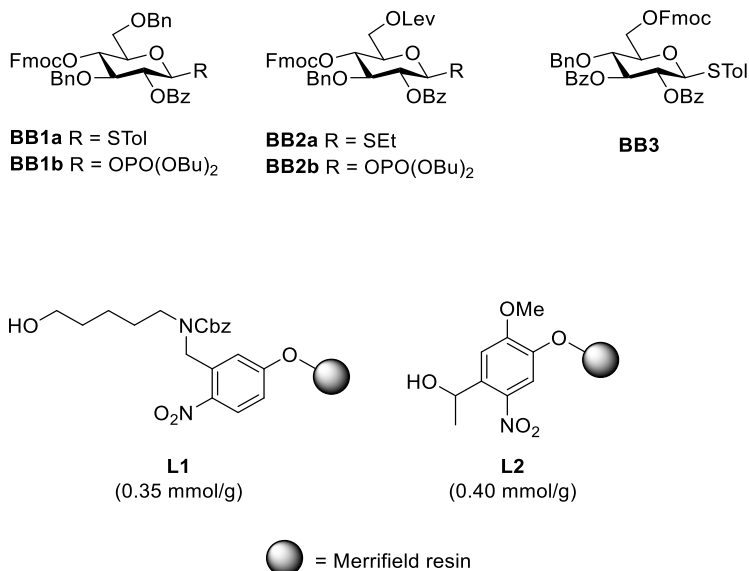

**Figure S1** BBs and solid supports used in this work.

Building block **BB1a** and **BB3** were purchased from GlycoUniverse (Germany). Building block **BB1b**, **BB2a** and **BB2b** were synthesized according to previously reported procedures.<sup>2, 3</sup> Merrifield resin equipped with a photocleavable linker (**L1**, loading 0.35 mmol/g and **L2**, loading 0.40 mmol/g) was prepared according to previous literature.<sup>4</sup>

### 3. Automated glycan assembly

#### 3.1 General materials and methods

The automated syntheses were performed on a home-built synthesizer developed at the Max Planck Institute of Colloids and Interfaces or the commercial synthesizer Glyconeer 3.1 (GlycoUniverse, Germany). All solvents used were HPLC-grade. The solvents used for the building blocks, activator, TMSOTf and capping solutions were taken from an anhydrous solvent system (J.C. Meyer). The building blocks were co-evaporated three times with toluene and dried for 1 h on high vacuum before use. Oven-heated, argon-flushed flasks were used to prepare all moisture-sensitive solutions. Activator, capping, deprotection, acidic wash and building block solutions were freshly prepared and kept under argon during the automation run. All yields of products obtained by AGA were calculated on the basis of resin loading. Resin loading was determined following previously established procedures.<sup>5</sup>

#### 3.2 Preparation of stock solutions

- **Building block solution:** Between 0.05 and 0.10 mmol of building block (depending on the BB, see Module C1 and C2) was dissolved in CH<sub>2</sub>Cl<sub>2</sub> (1 mL).
- **NIS/TfOH activator solution:** 1.35 g (6.0 mmol) of recrystallized NIS was dissolved in 40 mL of a 2:1 v/v mixture of anhydrous CH<sub>2</sub>Cl<sub>2</sub> and anhydrous dioxane. Then triflic acid (55  $\mu$ L, 0.6 mmol) was added. The solution was kept at 0 °C (ice bath) for the duration of the automation run.
- **Fmoc deprotection solution:** A solution of 20%<sub>v/v</sub> piperidine in DMF was prepared.
- **Lev deprotection solution:** Hydrazine acetate (550 mg, 5.97 mmol) was dissolved in pyridine/AcOH/H<sub>2</sub>O (40 mL, v/v, 32:8:2) and sonicated for 10 min.
- **TMSOTf solution:** TMSOTf (0.45 mL, 2.49 mmol) was added to CH<sub>2</sub>Cl<sub>2</sub> (40 mL).
- **TMSOTf solution 2:** TMSOTf (0.2 mL, 1.1 mmol) was added to CH<sub>2</sub>Cl<sub>2</sub> (80 mL). This solution was used for the synthesis of **APA**<sub>4</sub> and **(AP)**<sub>3</sub> with **BB1b** and **BB2b**.
- **Capping solution:** A solution of 10%<sub>v/v</sub> acetic anhydride and 2%<sub>v/v</sub> methanesulfonic acid in CH<sub>2</sub>Cl<sub>2</sub> was prepared.

#### 3.3 Modules for automated synthesis

##### Module A: Resin preparation

All automated syntheses were performed on 0.0125 mmol scale. Resin (**L1** or **L2**) is placed in the reaction vessel and swollen in CH<sub>2</sub>Cl<sub>2</sub> for 20 min at room temperature prior to the synthesis. During this time, all reagent lines needed for the synthesis are washed and primed. After the swelling, the resin is washed with DMF, THF, and CH<sub>2</sub>Cl<sub>2</sub> (three times each with 2 mL for 25 s).

##### Module B: Acidic wash with TMSOTf solution (20 min)

The resin is swollen in 2 mL CH<sub>2</sub>Cl<sub>2</sub> and the temperature of the reaction vessel adjusted to -20 °C. Upon reaching the low temperature, TMSOTf solution (1 mL) is added dropwise to the reaction vessel. After bubbling for 3 min, the acidic solution is drained and the resin is washed with 2 mL CH<sub>2</sub>Cl<sub>2</sub> for 25 s.

| Action  | Cycles | Solution | Amount | T (°C) | Incubation time |
|---------|--------|----------|--------|--------|-----------------|
| Cooling | -      | -        | -      | -20    | (15 min)*       |

|                |   |                                 |      |     |        |
|----------------|---|---------------------------------|------|-----|--------|
| <b>Deliver</b> | 1 | CH <sub>2</sub> Cl <sub>2</sub> | 2 mL | -20 | -      |
| <b>Deliver</b> | 1 | TMSOTf solution                 | 1 mL | -20 | 3 min  |
| <b>Wash</b>    | 1 | CH <sub>2</sub> Cl <sub>2</sub> | 2 mL | -20 | 25 sec |

\*Time required to reach the desired temperature.

#### Module C1: Thioglycoside glycosylation (35 min)

The building block solution (0.10 mmol of BB in 1 mL of CH<sub>2</sub>Cl<sub>2</sub> per glycosylation) is delivered to the reaction vessel. After the set temperature is reached, the reaction is started by dropwise addition of the NIS/TfOH activator solution (1.0 mL, excess). The glycosylation conditions are building block dependent<sup>6</sup> and reported for each synthesis. After completion of the reaction, the solution is drained and the resin is washed with CH<sub>2</sub>Cl<sub>2</sub>, CH<sub>2</sub>Cl<sub>2</sub>:dioxane (1:2, 3 mL for 20 s) and CH<sub>2</sub>Cl<sub>2</sub> (two times, each with 2 mL for 25 s). The temperature of the reaction vessel is increased to 25 °C for the next module.

| Action          | Cycles | Solution                                           | Amount | T (°C)                              | Incubation time                  |
|-----------------|--------|----------------------------------------------------|--------|-------------------------------------|----------------------------------|
| <b>Cooling</b>  | -      | -                                                  | -      | T <sub>1</sub>                      | -                                |
| <b>Deliver</b>  | 1      | BB solution                                        | 1 mL   | T <sub>1</sub>                      | -                                |
| <b>Deliver</b>  | 1      | NIS/TfOH activator solution                        | 1 mL   | T <sub>1</sub>                      | -                                |
| <b>Reaction</b> | 1      | -                                                  | -      | T <sub>1</sub><br>to T <sub>2</sub> | t <sub>1</sub><br>t <sub>2</sub> |
| <b>Wash</b>     | 1      | CH <sub>2</sub> Cl <sub>2</sub>                    | 2 mL   | T <sub>2</sub>                      | 5 sec                            |
| <b>Wash</b>     | 1      | CH <sub>2</sub> Cl <sub>2</sub> : Dioxane<br>(1:2) | 2 mL   | T <sub>2</sub>                      | 20 sec                           |
| <b>Heating</b>  | -      | -                                                  | -      | 25                                  | -                                |
| <b>Wash</b>     | 2      | CH <sub>2</sub> Cl <sub>2</sub>                    | 2 mL   | > 0                                 | 25 sec                           |

#### Module C2: Glycosyl phosphate glycosylation (45 min)

The building block solution (0.05 mmol of BB in 1 mL of CH<sub>2</sub>Cl<sub>2</sub> per glycosylation) is delivered to the reaction vessel. After the set temperature is reached, the reaction is started by dropwise addition of the TMSOTf solution (1.0 mL, stoichiometric or catalytic). After completion of the reaction, the solution is drained and the resin is washed with CH<sub>2</sub>Cl<sub>2</sub> (six times, each one is with 2 mL for 25 s). The temperature of the reaction vessel is increased to 25 °C for the next module.

| Action        | Cycles | Solution                        | Amount | T (°C)                              | Incubation time                  |
|---------------|--------|---------------------------------|--------|-------------------------------------|----------------------------------|
| Cooling       | -      | -                               | -      | T <sub>1</sub>                      | -                                |
| Deliver       | 1      | BB solution                     | 1 mL   | T <sub>1</sub>                      | -                                |
| Deliver       | 1      | TMSOTf solution                 | 1 mL   | T <sub>1</sub>                      | -                                |
| Reaction time | 1      | -                               | -      | T <sub>1</sub><br>to T <sub>2</sub> | t <sub>1</sub><br>t <sub>2</sub> |
| Wash          | 1      | CH <sub>2</sub> Cl <sub>2</sub> | 2 mL   | T <sub>2</sub>                      | 5 sec                            |
| Heating       | -      | -                               | -      | 25                                  | -                                |
| Wash          | 6      | CH <sub>2</sub> Cl <sub>2</sub> | 2 mL   | > 0                                 | 25 sec                           |

#### Module D: Capping (30 min)

The resin is washed with DMF (two times with 2 mL for 25 s) and the temperature of the reaction vessel adjusted to 25 °C. A pyridine solution (2 mL, 10%<sub>v/v</sub> in DMF) is delivered into the reaction vessel. After 1 min, the reaction solution is drained and the resin is washed with CH<sub>2</sub>Cl<sub>2</sub> (three times with 3 mL for 25 s). Capping solution (4 mL) is delivered into the reaction vessel. After 20 min, the reaction solution is drained and the resin is washed with CH<sub>2</sub>Cl<sub>2</sub> (three times with 3 mL for 25 s).

| Action  | Cycles | Solution                        | Amount | T (°C) | Incubation time |
|---------|--------|---------------------------------|--------|--------|-----------------|
| Heating | -      | -                               | -      | 25     | (5 min)*        |
| Wash    | 2      | DMF                             | 2 mL   | 25     | 25 sec          |
| Deliver | 1      | 10% Pyridine in DMF             | 2 mL   | 25     | 1 min           |
| Wash    | 3      | CH <sub>2</sub> Cl <sub>2</sub> | 2 mL   | 25     | 25 sec          |
| Deliver | 1      | Capping Solution                | 4 mL   | 25     | 20 min          |
| Wash    | 3      | CH <sub>2</sub> Cl <sub>2</sub> | 2 mL   | 25     | 25 sec          |

\*Time required to reach the desired temperature.

#### Module E1: Fmoc deprotection (9 min)

The resin is washed with DMF (three times with 2 mL for 25 s) and the temperature of the reaction vessel is adjusted to 25 °C. Fmoc deprotection solution (2 mL) is delivered to the reaction vessel and kept under Ar bubbling. After 5 min, the reaction solution is drained and the resin is washed with DMF (three times with 3 mL for 25 s) and CH<sub>2</sub>Cl<sub>2</sub> (five times each with 2 mL for 25 s). The temperature of the reaction vessel is decreased to -20 °C for the next module.

| Action  | Cycles | Solution            | Amount | T (°C) | Incubation time |
|---------|--------|---------------------|--------|--------|-----------------|
| Wash    | 3      | DMF                 | 2 mL   | 25     | 25 sec          |
| Deliver | 1      | Fmoc depr. solution | 2 mL   | 25     | 5 min           |

|                |   |                                 |      |      |        |
|----------------|---|---------------------------------|------|------|--------|
| <b>Wash</b>    | 1 | DMF                             | 2 mL |      |        |
| <b>Cooling</b> | - | -                               | -    | -20  | -      |
| <b>Wash</b>    | 3 | DMF                             | 2 mL | < 25 | 25 sec |
| <b>Wash</b>    | 5 | CH <sub>2</sub> Cl <sub>2</sub> | 2 mL | < 25 | 25 sec |

### Module E2: Lev deprotection (90 min)

The resin is washed with CH<sub>2</sub>Cl<sub>2</sub> (three times with 2 mL for 25 s). CH<sub>2</sub>Cl<sub>2</sub> (1.3 mL) is delivered to the reaction vessel and the temperature of the reaction vessel is adjusted to 25 °C. Lev deprotection solution (2 mL) is delivered to the reaction vessel, kept under Ar bubbling for 30 min. This procedure is repeated twice. The reaction solution is drained and the resin is washed with DMF (three times with 3 mL for 25 s) and CH<sub>2</sub>Cl<sub>2</sub> (five times each with 2 mL for 25 s).

| Action         | Cycles | Solution                        | Amount | T (°C) | Incubation time |
|----------------|--------|---------------------------------|--------|--------|-----------------|
| <b>Wash</b>    | 3      | DMF                             | 2 mL   | 25     | 25 sec          |
| <b>Deliver</b> | 2      | Lev depr. solution              | 2 mL   | 25     | 30 min          |
| <b>Wash</b>    | 1      | DMF                             | 2 mL   | -      | -               |
| <b>Cooling</b> | -      | -                               | -      | -20    | -               |
| <b>Wash</b>    | 3      | DMF                             | 2 mL   | < 25   | 25 sec          |
| <b>Wash</b>    | 5      | CH <sub>2</sub> Cl <sub>2</sub> | 2 mL   | < 25   | 25 sec          |



### 3.4 Post-AGA manipulations

#### Module F1: On-resin phosphorylation using H-phosphonate **4**

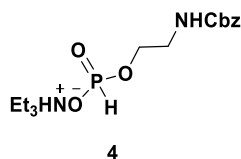

**4** was prepared according to a previously established procedure.<sup>7</sup>

A solution of **4** (5 equiv. per hydroxyl group) in anhydrous pyridine (4 mL) is evaporated and dried *in vacuo* overnight. The vacuum-dried resin-bound oligosaccharide is placed in a 5 mL fritted syringe and washed with anhydrous CH<sub>2</sub>Cl<sub>2</sub> (5 x 4 mL) to ensure high swelling of resin. After removal of CH<sub>2</sub>Cl<sub>2</sub>, a solution of **4** in anhydrous pyridine (1 mL) is added to the resin-bound oligosaccharide, followed by pivaloyl chloride (5 equiv. per hydroxyl group) in anhydrous pyridine (3 mL) and the suspension is gently shaken at room temperature for 5 h. The reaction solution is drained and the resin is washed with CH<sub>2</sub>Cl<sub>2</sub> (5 x 4 mL). A solution of iodine (20 equiv. per hydroxyl group) in pyridine/H<sub>2</sub>O (4 mL, v/v, 19:1) is added and the mixture is gently shaken at room temperature for another 2 h. The reaction solution is drained and the resin is repeatedly washed with CH<sub>2</sub>Cl<sub>2</sub> (5 x 4 mL).

#### Module F2: On-resin phosphorylation using phosphoramidite **5**

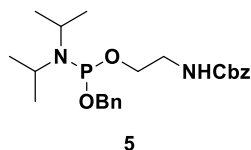

**5** was prepared according to a previously established procedure.<sup>8</sup>

A solution of **5** (5 equiv. per hydroxyl group) in anhydrous pyridine (4 mL) is evaporated and dried *in vacuo* overnight. The vacuum-dried resin-bound oligosaccharide is placed in a 5 mL fritted syringe and washed with anhydrous CH<sub>2</sub>Cl<sub>2</sub> (5 x 4 mL) to ensure high swelling of resin. After removal of CH<sub>2</sub>Cl<sub>2</sub>, a solution of **5** in anhydrous CH<sub>2</sub>Cl<sub>2</sub> (2 mL) is added to the resin-bound oligosaccharide, followed by tetrazole, 3 to 4 wt.% solution in MeCN (5 equiv. per hydroxyl group) in anhydrous CH<sub>2</sub>Cl<sub>2</sub> (2 mL). The suspension is gently shaken at room temperature for 5 h. The reaction solution is drained and the resin is washed using CH<sub>2</sub>Cl<sub>2</sub> (5 x 4 mL). A solution of iodine (20 equiv. per hydroxyl group) in pyridine/H<sub>2</sub>O (4 mL, v/v, 19:1) is added and the mixture is gently shaken at room temperature for another 2 h. The reaction solution is drained and the resin is repeatedly washed with CH<sub>2</sub>Cl<sub>2</sub> (5 x 4 mL).

### Module G: On-resin methanolysis

The resin is suspended in THF (4 mL). MeONa in MeOH (0.5 M, 0.4 mL) is added and the suspension is gently shaken at room temperature. After micro-cleavage (see *Module H2*) indicates the complete removal of all ester groups, the reaction solution is drained and the resin is repeatedly washed with MeOH (5 x 4 mL) and CH<sub>2</sub>Cl<sub>2</sub> (5 x 4 mL).

### Module H1: Cleavage from solid support

The oligosaccharide is cleaved from the solid support using a continuous-flow photoreactor as described previously.<sup>9</sup>

### Module H2: Micro-cleavage from solid support

Trace amount of resin (around 20 beads) is dispersed in CH<sub>2</sub>Cl<sub>2</sub> (0.1 mL) and irradiated with a UV lamp (6 W, 356 nm) for 10 min. MeCN (10 µL) is then added to the resin and the resulting solution is analyzed by MALDI.

### Module I: Hydrogenolysis at ambient pressure

The crude compound obtained from *Module H1* is dissolved in 2 mL of EtOAc:BuOH:H<sub>2</sub>O (2:1:1). Pd(OH)<sub>2</sub>/C (2.5 times the weight of the starting material) is added to the stirred vial, the reaction is purged for 5 min with a N<sub>2</sub> balloon, and equipped with a H<sub>2</sub> balloon. The reaction progress is monitored to avoid undesired side products formation (*i.e.* degradation of reducing end).<sup>10</sup> Upon completion, prior to filtration, thiourea (10 equiv.) is added to the reaction. The mixture is filtered (PTFE 0.45 µm 25 mm syringe filter, Fisher scientific) and washed with EtOAc, H<sub>2</sub>O, and MeCN (4 mL each). The filtrates are concentrated *in vacuo*.

### Module J: Purification

The final compounds are analyzed using analytical reversed phase HPLC (Agilent 1200 Series, Methods J3, J5 and J7). The purification of each crude is conducted using manual Sephadex® LH-20 column (Methods J1 and J2) and reverse phase HPLC (Agilent 1200 Series, Methods J4, J6 and J8).

- **Method J1:** Sephadex® LH-20 column with CH<sub>2</sub>Cl<sub>2</sub>:MeOH (1:1) as eluent, isocratic.
- **Method J2:** Sephadex® LH-20 column with H<sub>2</sub>O:MeOH (1:1) as eluent, isocratic.
- **Method J3:** (Hypercarb column, ThermoFisher scientific, 150 x 4.6 mm, 3 µm) flow rate of 0.7 mL/min with H<sub>2</sub>O (0.1% formic acid) and MeCN as eluents [isocratic (5 min), linear gradient to 50% MeCN (30 min), linear gradient to 100% MeCN (5 min), isocratic 100% MeCN (10 min)].
- **Method J4 (Prep):** (Hypercarb column, ThermoFisher scientific, 150 x 10 mm, 5 µm), flow rate of 3 mL/min with H<sub>2</sub>O (0.1% formic acid) and MeCN as eluents [isocratic (5 min), linear gradient to 50% MeCN (30 min), linear gradient to 100% MeCN (5 min), isocratic 100% MeCN (10 min)].
- **Method J5:** (Synergi Hydro RP18 column, Phenomenex, 250 x 4.6 mm), flow rate of 1.0 mL/min with H<sub>2</sub>O (0.1% formic acid) and MeCN as eluents [isocratic (5 min), linear gradient to 5% MeCN (10 min), linear gradient to 20% MeCN (10 min), isocratic 100% (MeCN 15 min)].
- **Method J6 (Prep):** (Synergi Hydro RP18 column, Phenomenex, 250 x 10 mm) flow rate of 4.0 mL/min with H<sub>2</sub>O (0.1% formic acid) and MeCN as eluents [isocratic (5 min), linear gradient to 5% MeCN (10 min), linear gradient to 100% MeCN (5 min), isocratic 100% MeCN (15 min)].
- **Method J7:** (Hypercarb column, ThermoFisher scientific, 150 x 4.6 mm, 3 µm) flow rate of 0.7 mL/min with H<sub>2</sub>O (0.1% formic acid) and MeCN as eluents [isocratic 20% MeCN (5 min), linear gradient to 50% MeCN (20 min), linear gradient to 100% MeCN (10 min)].

- **Method J8 (Prep):** (Hypercarb column, ThermoFisher scientific, 150 x 10 mm, 5  $\mu$ m), flow rate of 3 mL/min with H<sub>2</sub>O (0.1% formic acid) and MeCN as eluents [isocratic 20% MeCN (5 min), linear gradient to 50% MeCN (20 min), linear gradient to 100% MeCN (10 min)].
- **Method J9:** (Synergi Hydro RP18 column, Phenomenex, 250 x 4.6 mm), flow rate of 1.0 mL/min with H<sub>2</sub>O (0.1% formic acid) and MeCN as eluents [isocratic (5 min), linear gradient to 5% MeCN (10 min), linear gradient to 30% MeCN (20 min), isocratic 100% (MeCN 5 min)].

### 3.5 Characterization of phosphorylating reagent 4 and 5

**Characterization of 4:**  $^1\text{H}$  NMR (400 MHz,  $\text{CDCl}_3$ )  $\delta$  7.28 – 7.22 (m, 5H), 6.17 (br, 1H), 5.96 (br, 1H), 5.00 (s, 2H), 3.90 – 3.85 (m, 2H), 3.36 (dd,  $J = 10.8$  Hz, 5.6 Hz, 2H), 2.95 (dd,  $J = 15.6$  Hz, 7.6 Hz, 7H), 1.22 (t,  $J = 7.2$  Hz, 9H).  $^{31}\text{P}$  NMR (162 MHz,  $\text{CDCl}_3$ )  $\delta$  5.49.

$^1\text{H}$  NMR of 4 (400 MHz,  $\text{CDCl}_3$ )

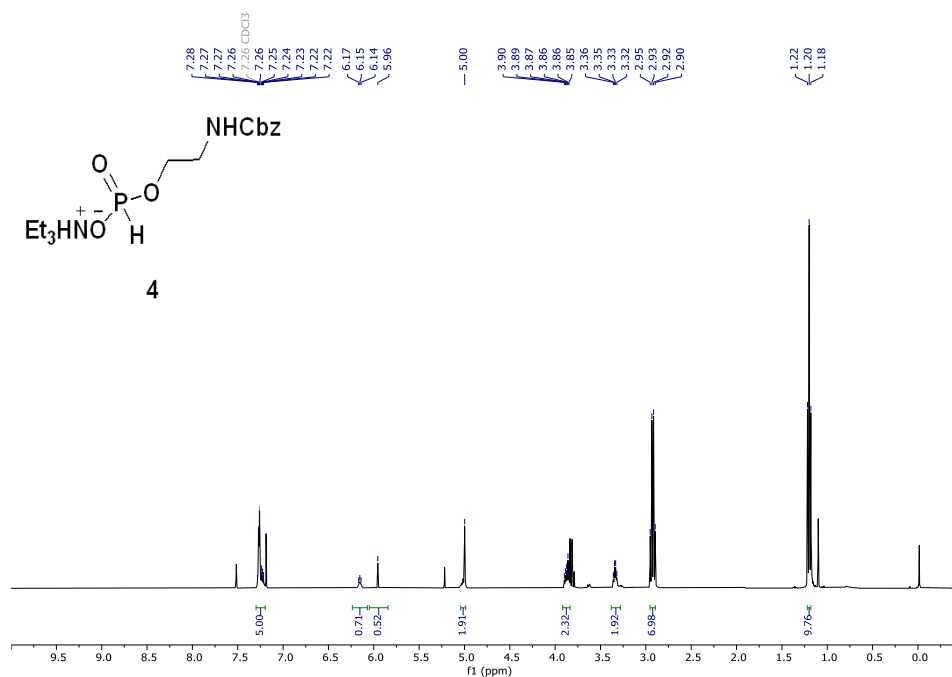

$^{31}\text{P}$  NMR of 4 (400 MHz,  $\text{CDCl}_3$ )

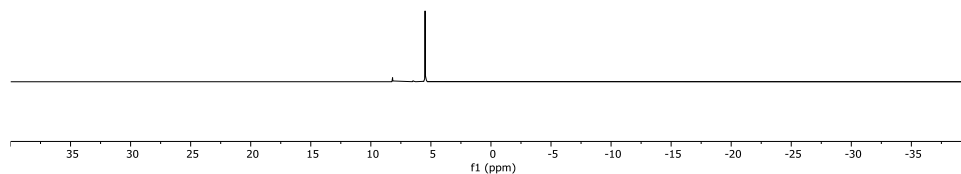

**Characterization of 5:**  $^1\text{H}$  NMR (400 MHz,  $\text{CDCl}_3$ )  $\delta$  7.29 – 7.16 (m, 10H), 5.23 (br, 1H), 5.02 (s, 2H), 4.70 – 4.56 (m, 2H), 3.68 – 3.54 (m, 4H), 3.35 (q,  $J = 5.2$  Hz, 2H), 1.13 (d,  $J = 6.8$  Hz, 12H).  $^{31}\text{P}$  NMR (162 MHz,  $\text{CDCl}_3$ )  $\delta$  147.85.

$^1\text{H}$  NMR of 5 (400 MHz,  $\text{CDCl}_3$ )

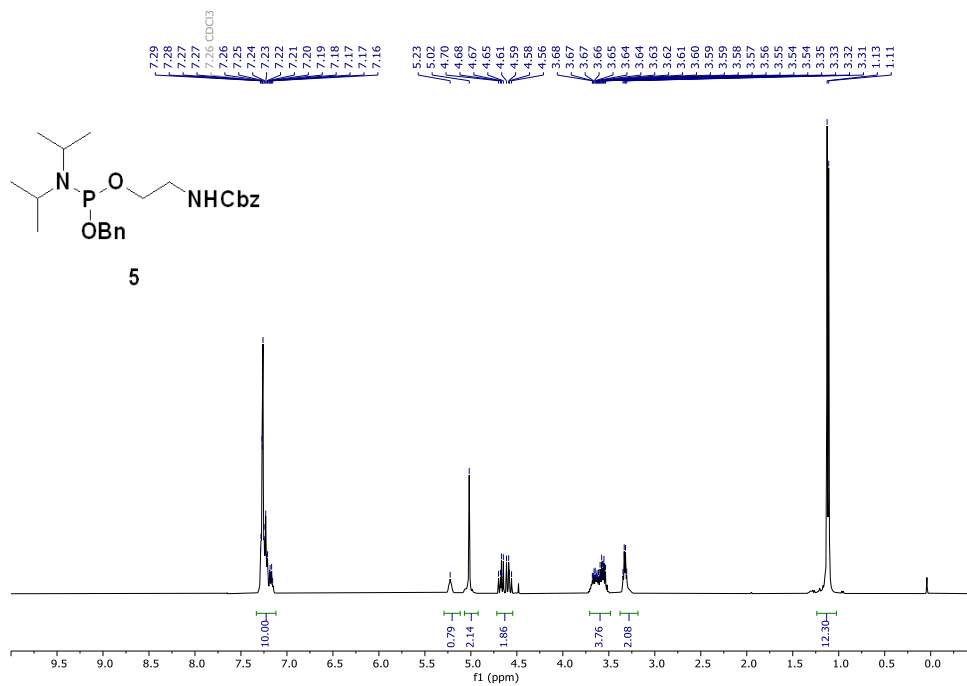

$^{31}\text{P}$  NMR of 5 (400 MHz,  $\text{CDCl}_3$ )

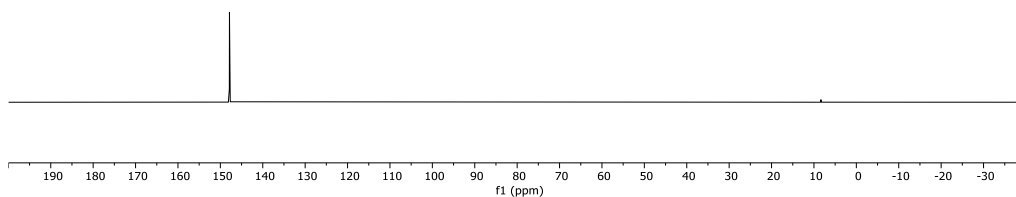

## 4. Oligosaccharide synthesis

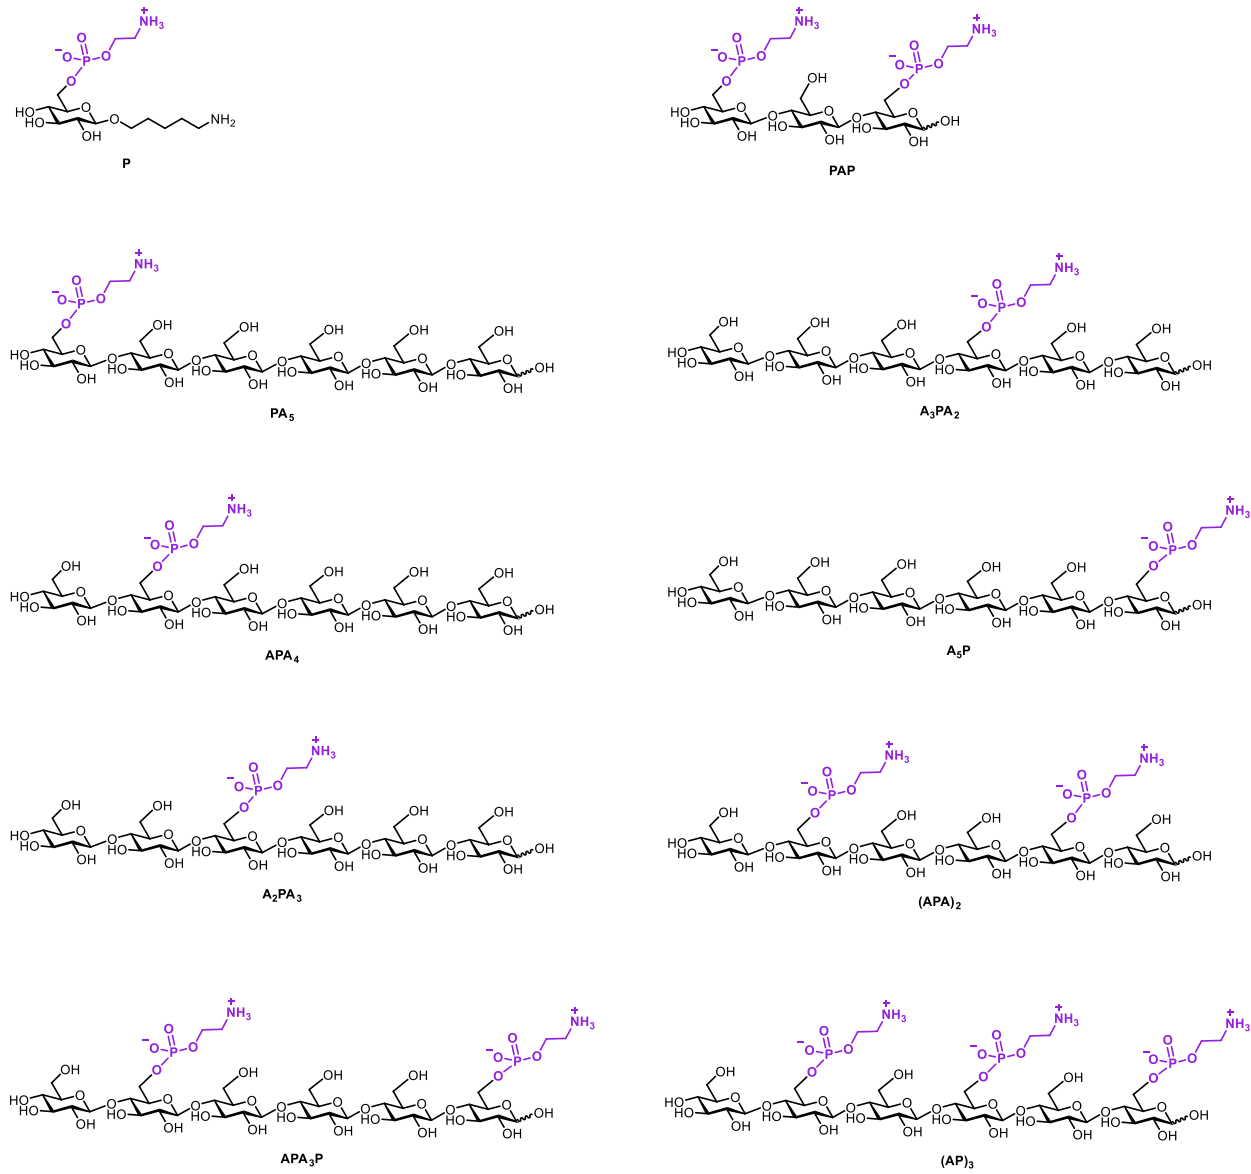

**Figure S2** Collection of pEtN-cellulose analogues synthesized by AGA.

#### 4.1 Optimization of solid-phase synthesis of pEtN-modified glucoside P

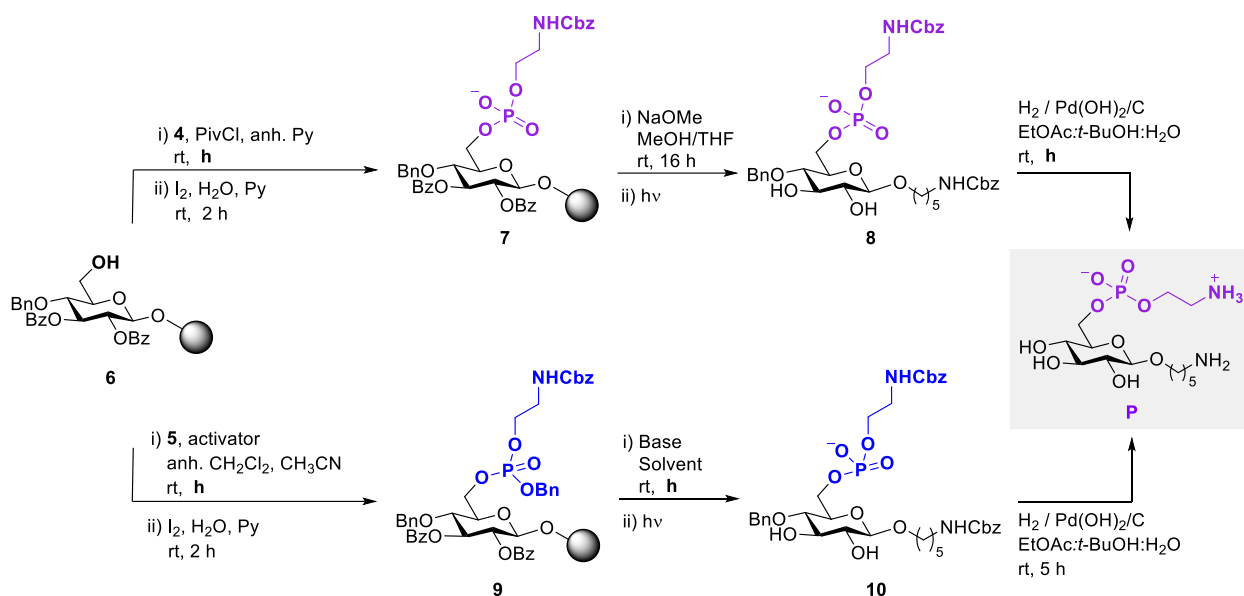

Scheme S1 Synthetic routes for P

Table S1 Screening of condition using 4.

| Phosphorylation |            |                |          |                          | Hydrogenation |          |                                |                            |
|-----------------|------------|----------------|----------|--------------------------|---------------|----------|--------------------------------|----------------------------|
| Entry           | 4 (equiv.) | PivCl (equiv.) | Time (h) | Result <sup>a</sup>      | Entry         | Time (h) | Additive (equiv.) <sup>a</sup> | Overall yield <sup>b</sup> |
| 1               | 50         | 50             | 16       | Partial phosphorylation  | 6             | 3        | -                              | Incomplete conversion      |
| 2               | 25         | 25             | 16       | Complete phosphorylation | 7             | 5        | -                              | 6%                         |
| 3               | 25         | 25             | 5        | Complete phosphorylation | 8             | 5        | Thiourea (6)                   | 19%                        |
| 4               | 5          | 5              | 5        | Complete phosphorylation | 9             | 5        | Thiourea (10)                  | 36%                        |
| 5               | 5          | 5              | 1        | Partial phosphorylation  |               |          |                                |                            |

<sup>a</sup> Results analyzed after oxidation step.

<sup>a</sup> Upon completion of hydrogenation, prior to filtration, the crude mixture was treated with thiourea. <sup>b</sup> Overall yield includes AGA, phosphorylation and deprotections.

Table S2 Screening of condition using 5.

| Phosphorylation |            |                            |          |                          | Hydrolysis |               |              |          |                     |
|-----------------|------------|----------------------------|----------|--------------------------|------------|---------------|--------------|----------|---------------------|
| Entry           | 5 (equiv.) | Activator (equiv.)         | Time (h) | Result <sup>a</sup>      | Entry      | Base          | Solvent      | Time (h) | Result              |
| 10              | 25         | 1 <i>H</i> -tetrazole (25) | 16       | Complete phosphorylation | 13         | LiOH (0.3 M)  | 4:1 THF/MeOH | 48       | No conversion       |
| 11              | 5          | 1 <i>H</i> -tetrazole (5)  | 5        | Complete phosphorylation | 14         | NaOMe (0.5 M) | 4:1 THF/MeOH | 3        | Partial hydrolysis  |
| 12              | 5          | BTT (5)                    | 5        | Complete phosphorylation | 15         | NaOMe (0.5 M) | 4:1 THF/MeOH | 16       | Complete hydrolysis |

<sup>a</sup> Results analyzed after oxidation step.

#### 4.1.1 Mass spectrometry and additional information

##### Analysis of intermediate 7

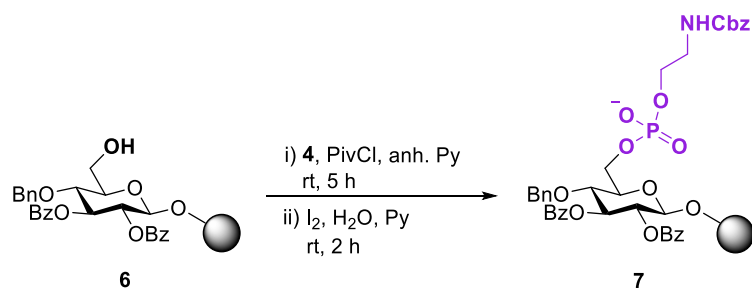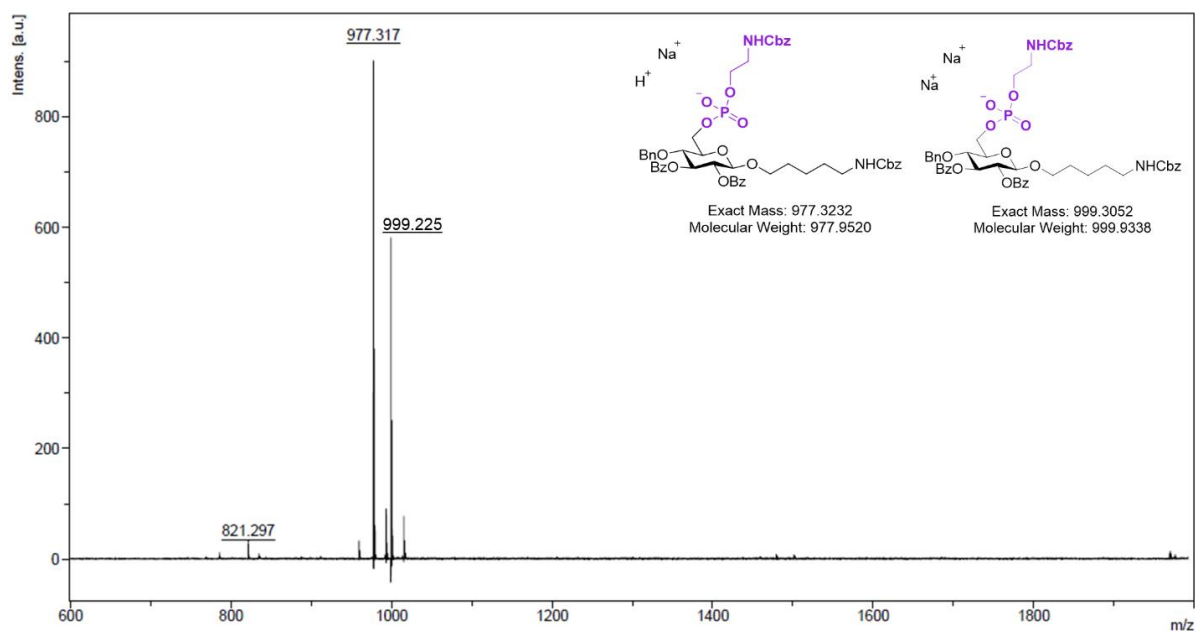

Figure S2 MALDI-ToF of compound 7 after microcleavage (positive mode).



## Analysis of intermediate 8

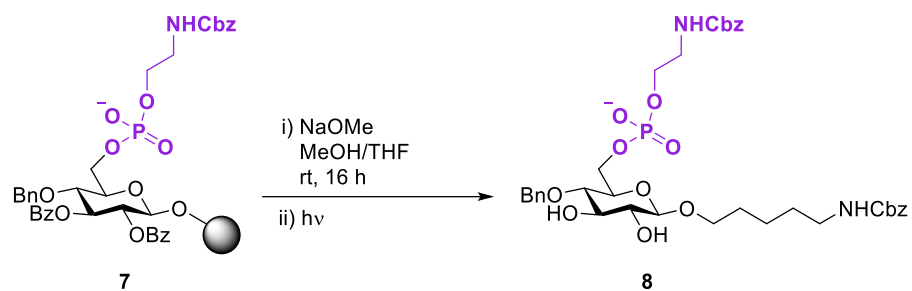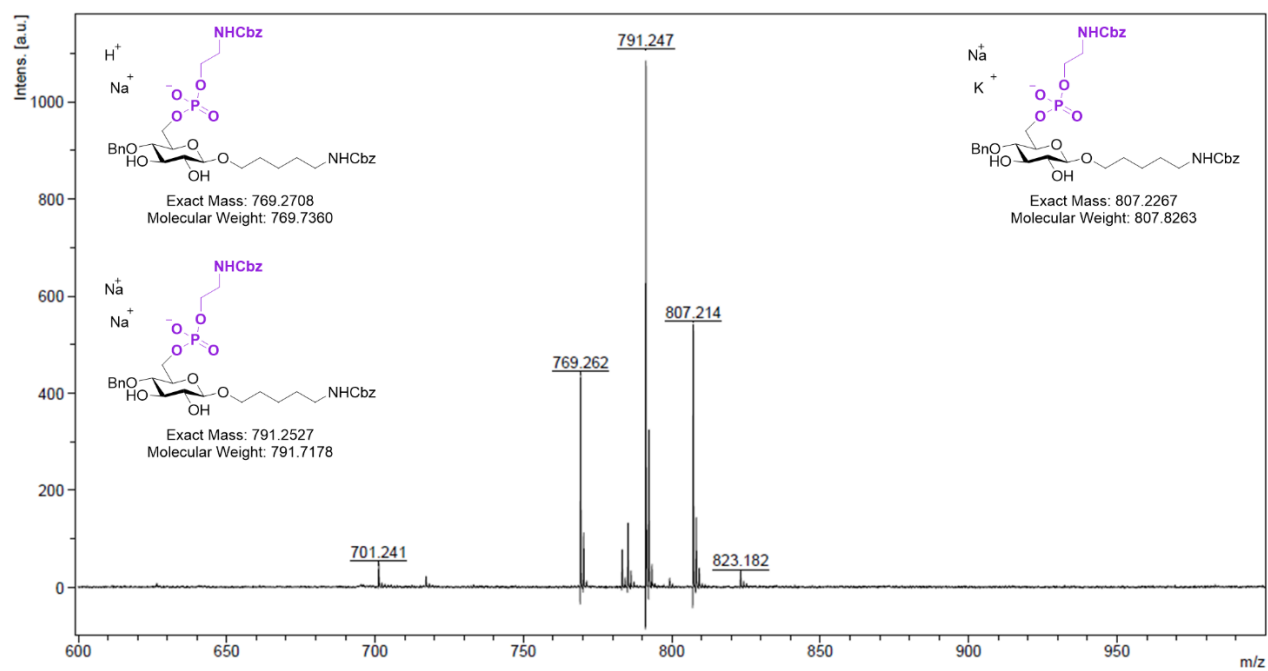

Figure S3 MALDI-ToF of compound **8** after microcleavage (positive mode).

## Analysis of the intermediate 9

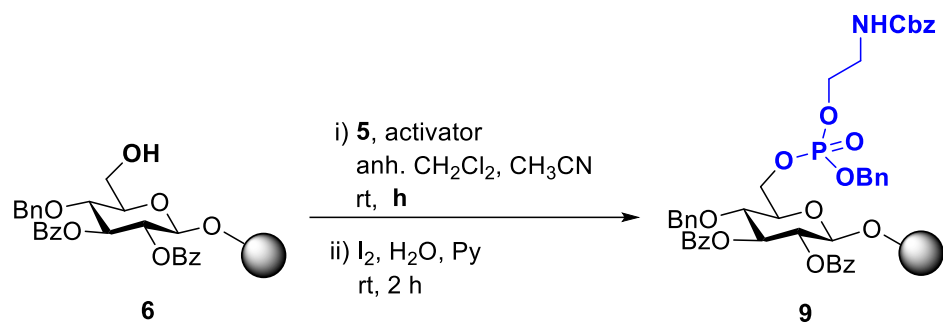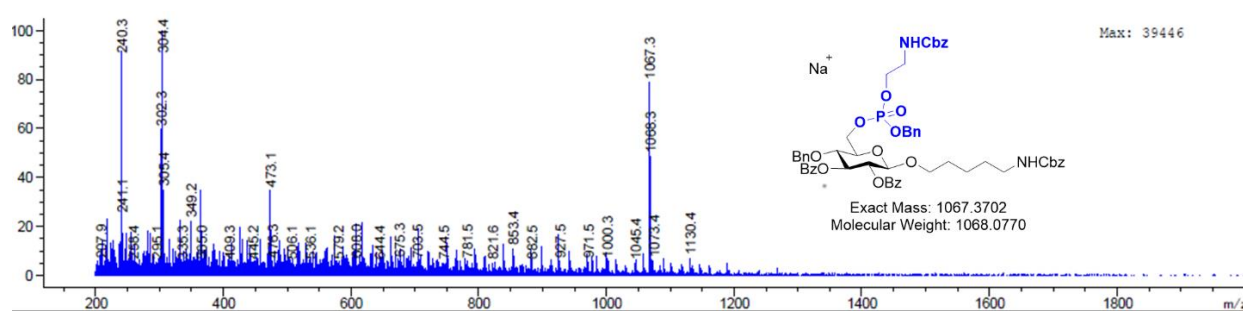

Figure S4 ESI-MS of compound **9** after microcleavage (positive mode).

## Analysis of the intermediate 10

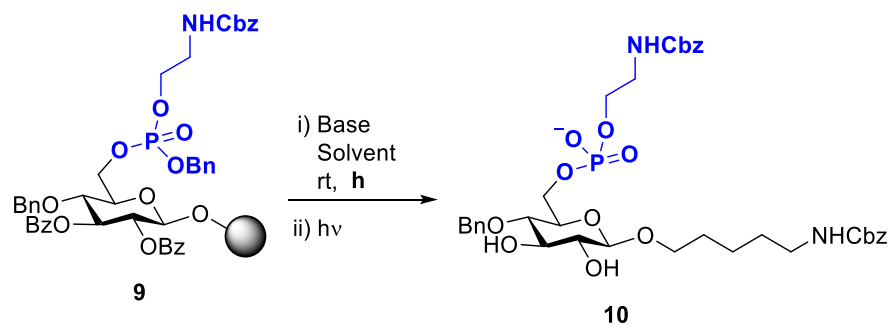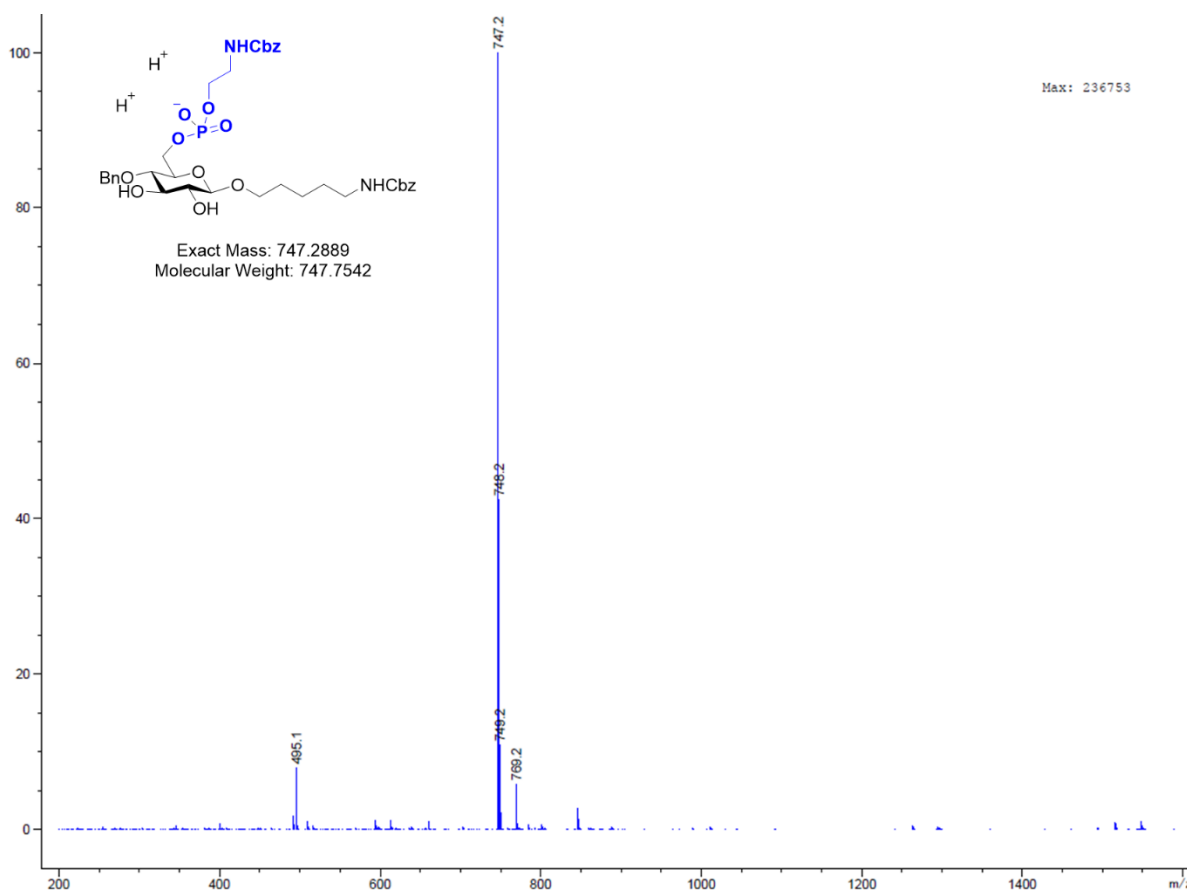

Figure S5 ESI-MS of compound **9** after photocleavage (positive mode).

## 4.2 Synthesis of **P**

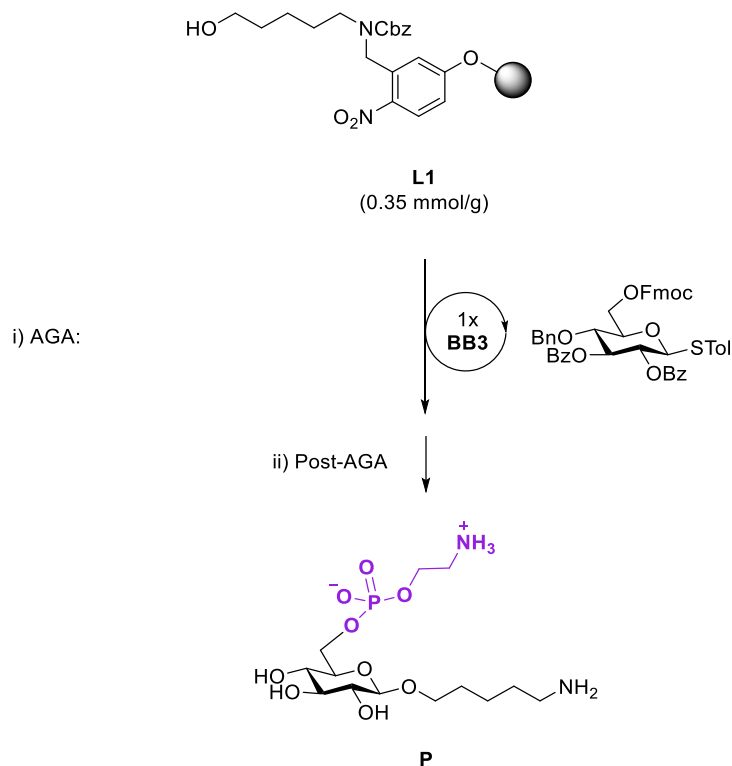

| Step     | Modules                            | Notes                                          |
|----------|------------------------------------|------------------------------------------------|
| AGA      | <b>A</b>                           | <b>L1</b> swelling                             |
|          | <b>BB3</b><br><b>B, C1, D, E1</b>  | <b>C1:</b> (-20 °C for 5 min, 0 °C for 20 min) |
| Post-AGA | <b>Phosphorylation</b><br><b>F</b> |                                                |
|          | <b>Hydrolysis</b><br><b>G</b>      | <b>G:</b> (16 h)                               |
|          | <b>Hydrogenolysis</b><br><b>I</b>  | <b>I:</b> (5 h)                                |
|          | <b>Purification</b><br><b>J</b>    | <b>J:</b> (Method J4: 13.5 min)                |

Automated synthesis, global deprotection, and purification afforded **P** as white solid (1.9 mg, 36% overall yield).

<sup>1</sup>H NMR (400 MHz, D<sub>2</sub>O) δ 4.43 (d, *J* = 8.0 Hz, 1H), 4.10 – 3.99 (m, 4H), 3.88 – 3.84 (m, 1H), 3.67 – 3.63 (m, 1H), 3.51 – 3.50 (br, 1H), 3.44 – 3.41 (m, 2H), 3.23 – 3.19 (m, 3H), 2.96 (t, *J* = 7.6 Hz, 2H), 1.66 – 1.58 (m, 4H), 1.44 – 1.37 (m, 2H). <sup>31</sup>P NMR (162 MHz, D<sub>2</sub>O) δ 0.25. ESI-MS *m/z* 389.1 [M+H]<sup>+</sup> (C<sub>13</sub>H<sub>30</sub>N<sub>2</sub>O<sub>9</sub>P requires 389.1683). Analytical data of **P** are in good agreement with previously reported data.<sup>11</sup>

# <sup>1</sup>H NMR of P (400 MHz, D<sub>2</sub>O)

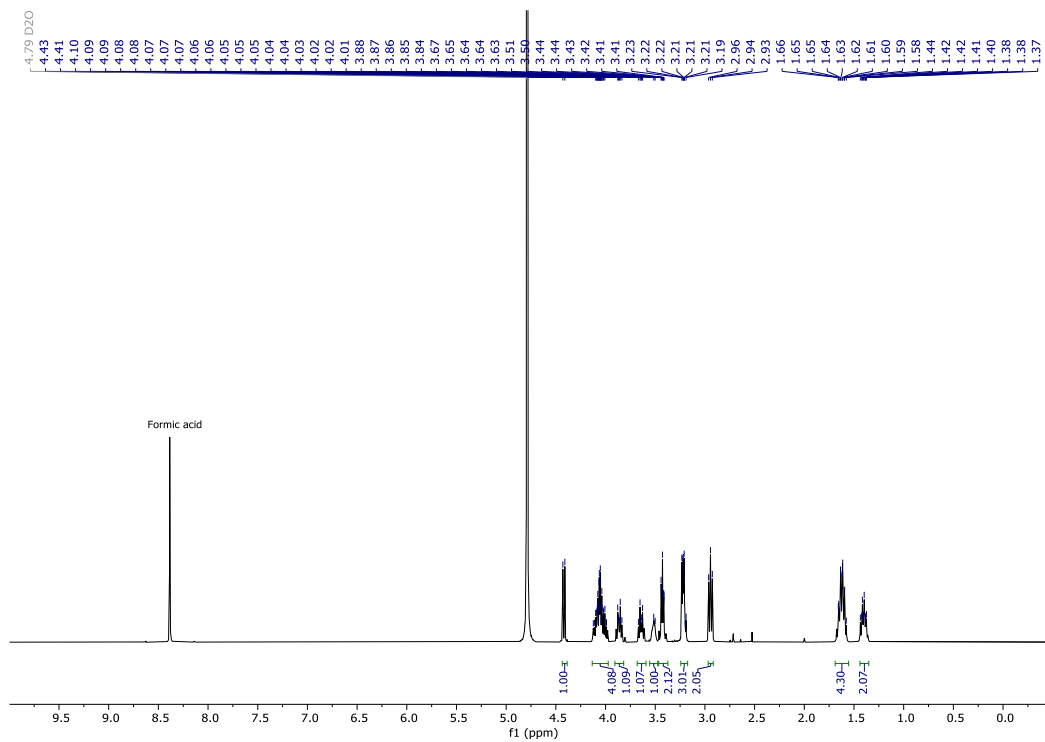

# <sup>31</sup>P NMR of P (162 MHz, D<sub>2</sub>O)

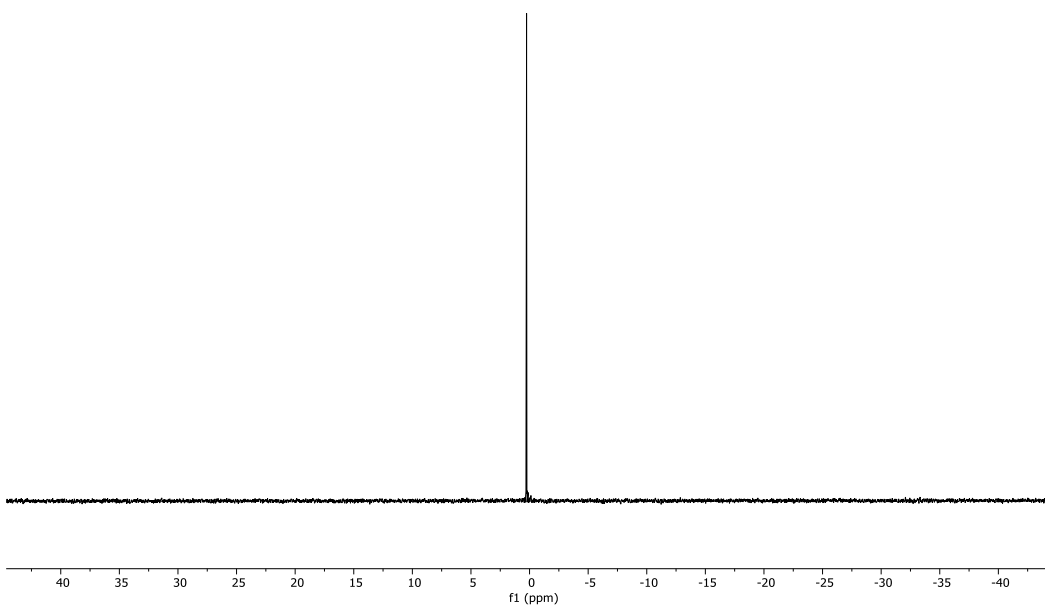

### 4.3 Synthesis of PAP

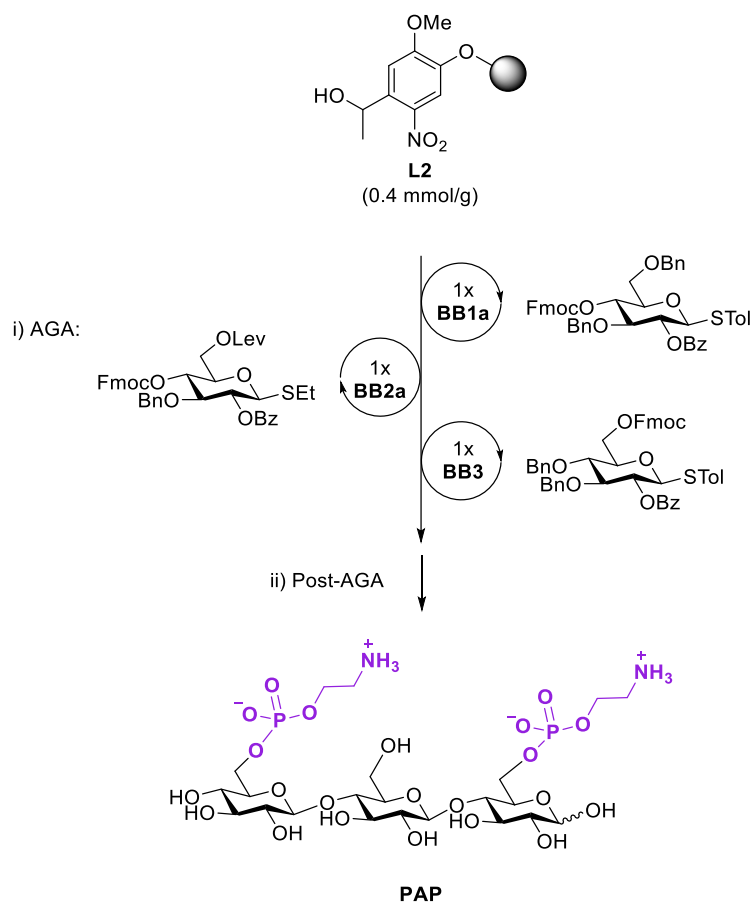

| Step     |                        | Modules     | Notes                                                                     |
|----------|------------------------|-------------|---------------------------------------------------------------------------|
| AGA      |                        | <b>A</b>    | <b>L2</b> swelling                                                        |
|          |                        | <b>BB1a</b> | <b>B, C1, D, E1</b><br><b>C1:</b> (-20 °C for 5 min, 0 °C for 20 min)     |
|          |                        | <b>BB2a</b> | <b>B, C1, D, E1</b><br><b>C1:</b> (-20 °C for 5 min, 0 °C for 20 min)     |
|          |                        | <b>BB3</b>  | <b>B, C1, D, E1, E2</b><br><b>C1:</b> (-20 °C for 5 min, 0 °C for 20 min) |
| Post-AGA | <b>Phosphorylation</b> | <b>F</b>    |                                                                           |
|          | <b>Hydrolysis</b>      | <b>G</b>    | <b>G:</b> (2 h)                                                           |
|          | <b>Purification</b>    | <b>J</b>    | <b>J:</b> (Method J1)                                                     |
|          | <b>Hydrogenolysis</b>  | <b>I</b>    | <b>I:</b> (4 h)                                                           |
|          | <b>Purification</b>    | <b>J</b>    | <b>J:</b> (Method J4: 19.4 min)                                           |

Automated synthesis, global deprotection, and purification afforded **PAP** as white solid (0.7 mg, 7% overall yield).

$^1\text{H}$  NMR (600 MHz,  $\text{D}_2\text{O}$ )  $\delta$  5.18 (d,  $J = 4.2$  Hz, 0.4H, H1- $\alpha$ ), 4.64. (d,  $J = 7.8$  Hz, 0.6H, H1- $\beta$ ), 4.56 (dd,  $J = 7.8$  Hz, 2.4 Hz, 1H), 4.49 (d,  $J = 7.8$  Hz, 1H), 4.16 – 4.01 (m, 10H), 3.95 – 3.93 (d,  $J = 12.6$  Hz, 1H), 3.80 – 3.77 (m, 1H), 3.69 – 3.67 (m, 1H), 3.65 – 3.54 (m, 6H), 3.50 – 3.45 (m, 2H), 3.32 – 3.21 (m, 7H).  $^{31}\text{P}$  NMR (243 MHz,  $\text{D}_2\text{O}$ )  $\delta$  0.34, 0.04, -0.01. HRMS (QToF)  $m/z$  751.1946  $[\text{M}+\text{H}]^+$  ( $\text{C}_{22}\text{H}_{45}\text{N}_2\text{O}_{22}\text{P}_2$  requires 751.1934).

**RP-HPLC of PAP (ELSD trace, Method J3,  $t_R = 18.1, 18.3$  min)**

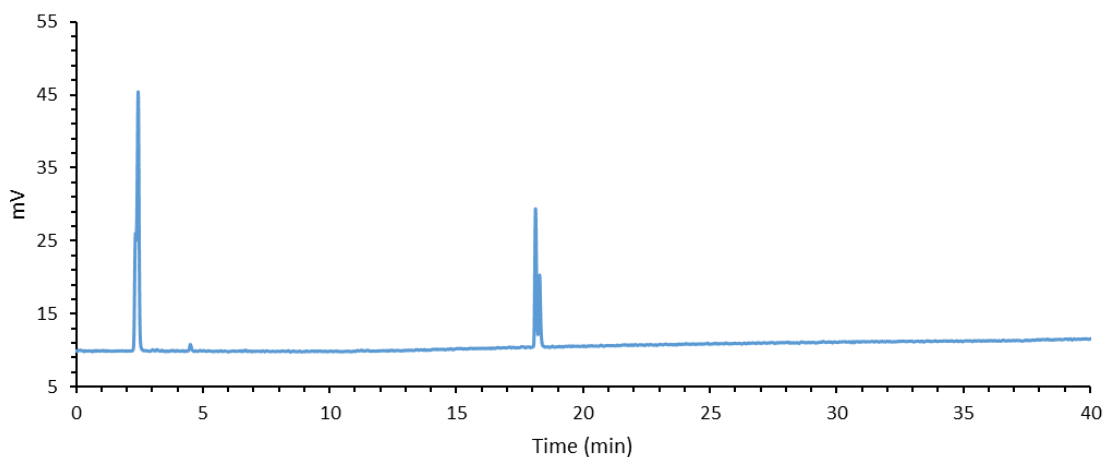

**$^1\text{H}$  NMR of PAP (600 MHz,  $\text{D}_2\text{O}$ )**

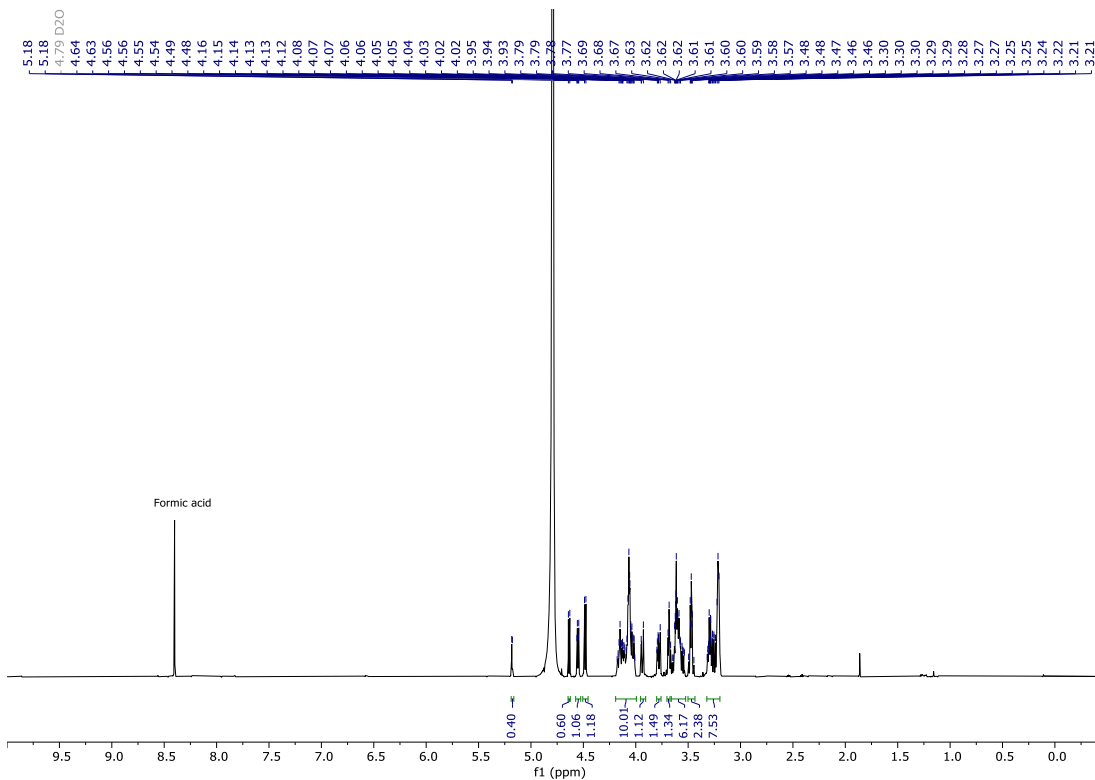

### $^{31}\text{P}$ NMR of PAP (243 MHz, $\text{D}_2\text{O}$ )

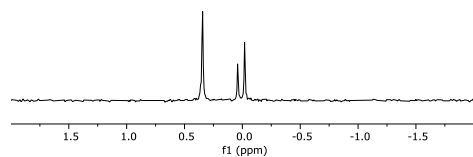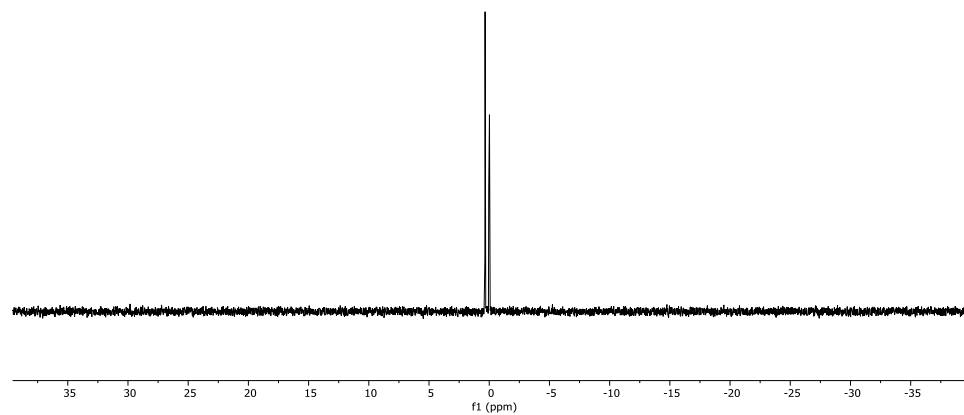

### HSQC NMR of PAP ( $\text{D}_2\text{O}$ )

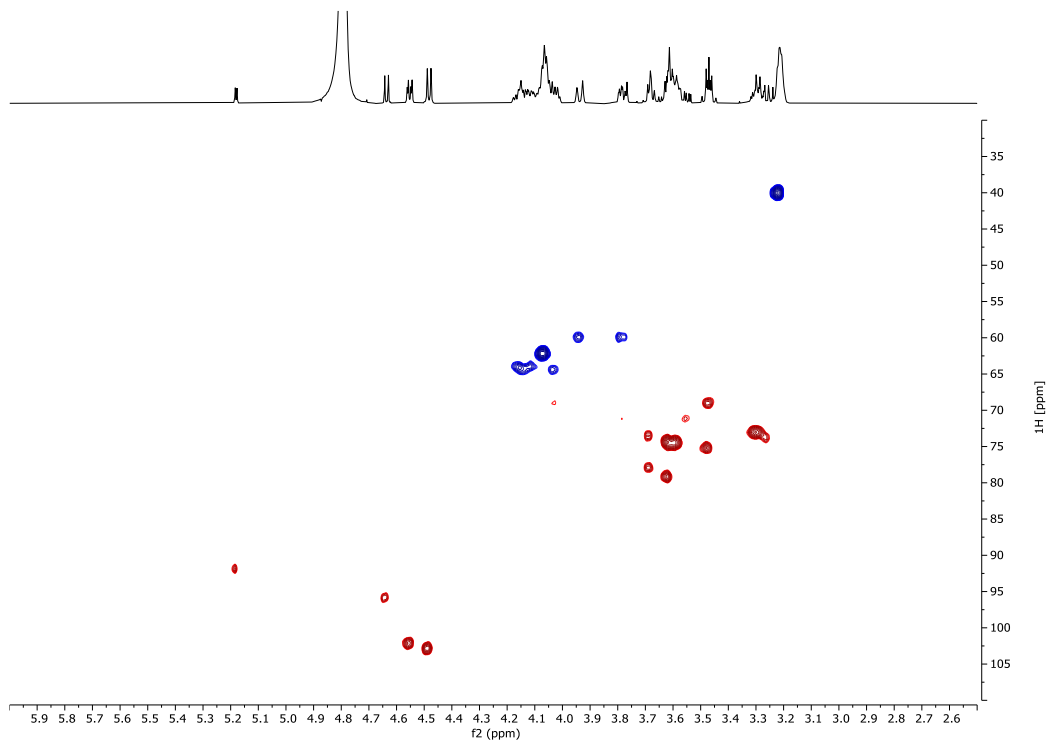



#### 4.4 Synthesis of PA<sub>5</sub>

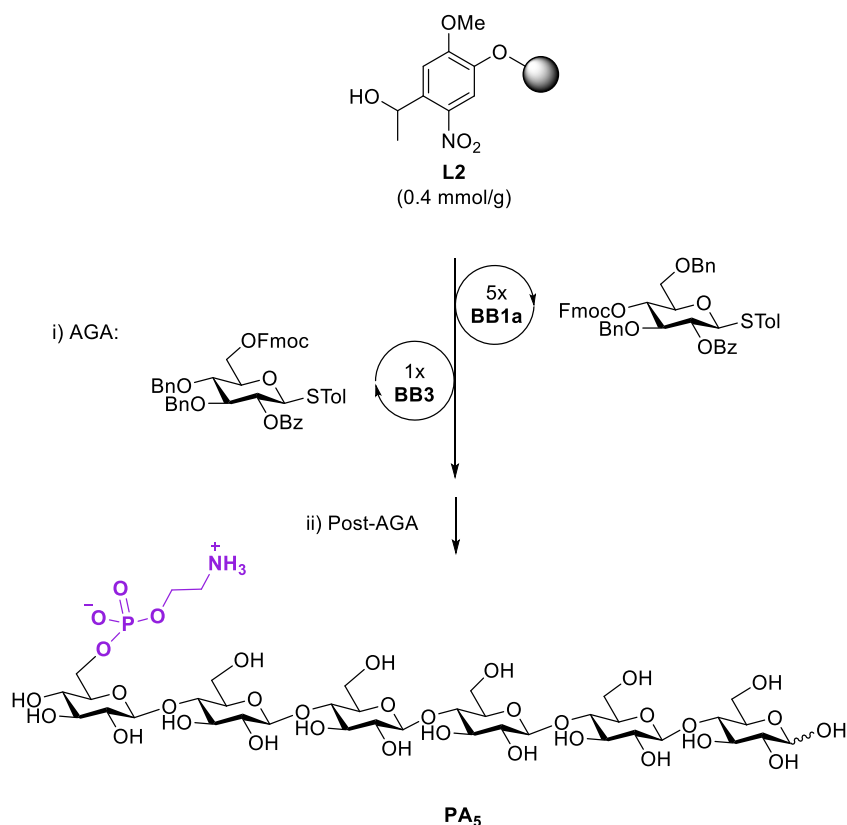

| Step     | Modules                       | Notes                                      |                                                                                                  |
|----------|-------------------------------|--------------------------------------------|--------------------------------------------------------------------------------------------------|
| AGA      | <b>A</b>                      | <b>L2</b> swelling                         |                                                                                                  |
|          | <b>5 x BB1a</b><br><b>BB3</b> | <b>B, C1, D, E1</b><br><b>B, C1, D, E1</b> | <b>C1:</b> (-20 °C for 5 min, 0 °C for 20 min)<br><b>C1:</b> (-20 °C for 5 min, 0 °C for 20 min) |
| Post-AGA | <b>Phosphorylation</b>        | <b>F</b>                                   |                                                                                                  |
|          | <b>Hydrolysis</b>             | <b>G</b>                                   | <b>G:</b> (2 h)                                                                                  |
|          | <b>Purification</b>           | <b>J</b>                                   | <b>J:</b> (Method J1)                                                                            |
|          | <b>Hydrogenolysis</b>         | <b>I</b>                                   | <b>I:</b> (4 h)                                                                                  |
|          | <b>Purification</b>           | <b>J</b>                                   | <b>J:</b> (Method J6: 16.2 min)                                                                  |

Automated synthesis, global deprotection, and purification afforded **PA<sub>5</sub>** as white solid (0.6 mg, 4% overall yield).

<sup>1</sup>H NMR (700 MHz, D<sub>2</sub>O) δ 5.17 (d, *J* = 4.9 Hz, 0.4H, H1-α), 4.61 (d, *J* = 9.1 Hz, 0.6H, H1-β), 4.49 (d, *J* = 9.1 Hz, 5H), 4.02 – 4.01 (m, 1H), 3.94 – 3.89 (m, 3H), 3.83 – 3.75 (m, 5H), 3.64 – 3.51 (m, 16H), 3.49 – 3.44 (m, 1H), 3.32 – 3.27 (m, 4H), 3.13 – 3.20 (m, 1H). <sup>31</sup>P NMR (243 MHz, D<sub>2</sub>O) δ 0.29. HRMS (QToF) *m/z* 1114.346 [M+H]<sup>+</sup> (C<sub>38</sub>H<sub>69</sub>NO<sub>34</sub>P requires 1114.343).

RP-HPLC of PA<sub>5</sub> (ELSD trace, Method J5, t<sub>R</sub> = 15.2, 15.3 min)

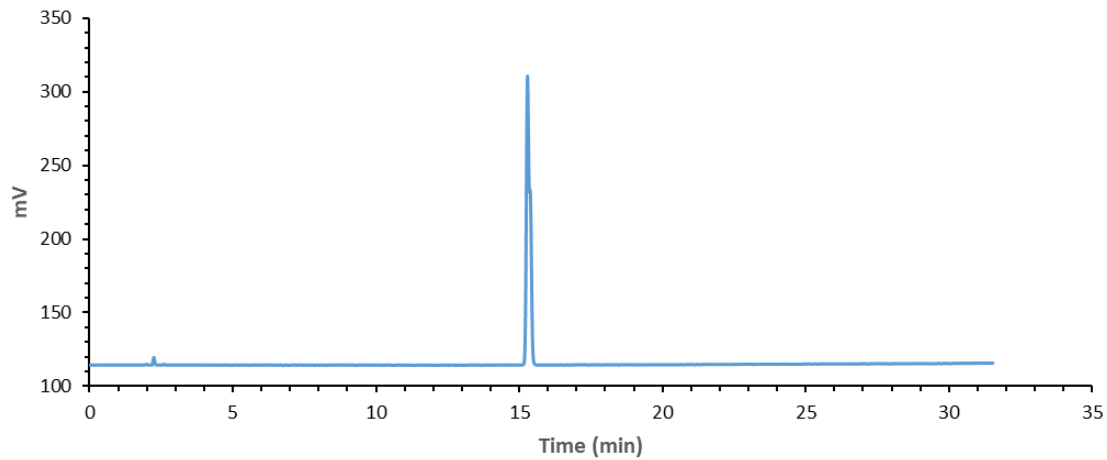

<sup>1</sup>H NMR of PA<sub>5</sub> (700 MHz, D<sub>2</sub>O)

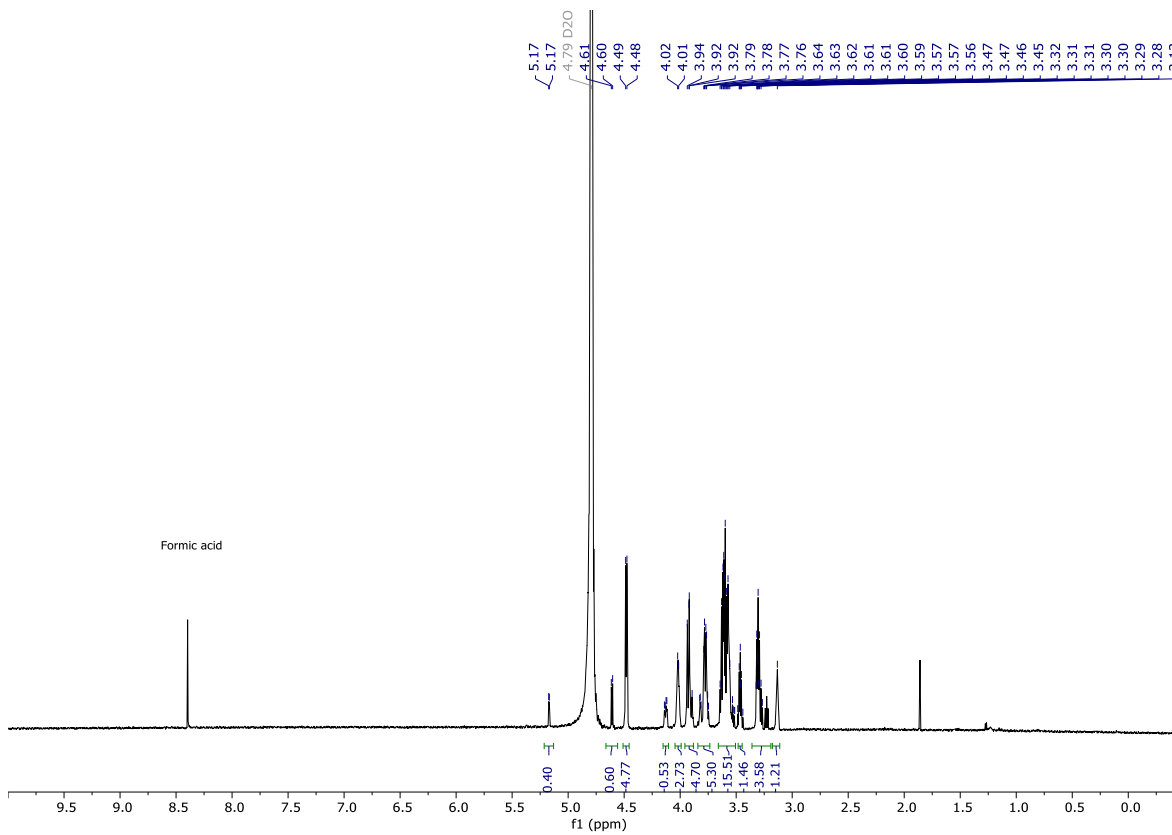

### $^{31}\text{P}$ NMR of PA<sub>5</sub> (162 MHz, D<sub>2</sub>O)

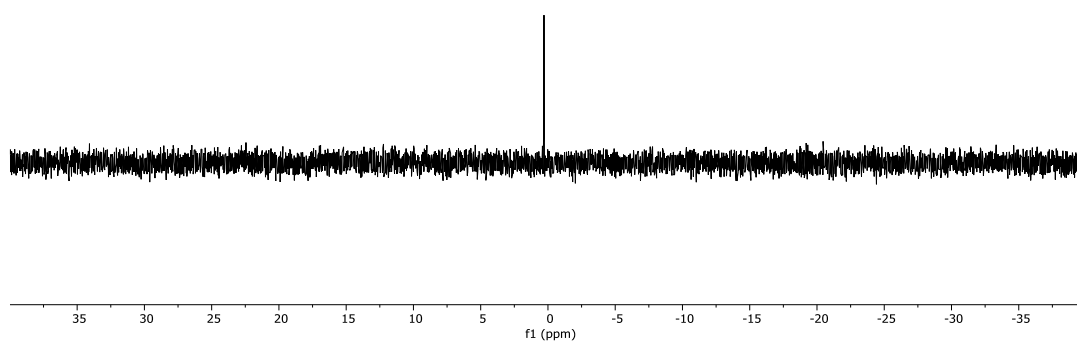

### HSQC NMR of PA<sub>5</sub> (D<sub>2</sub>O)

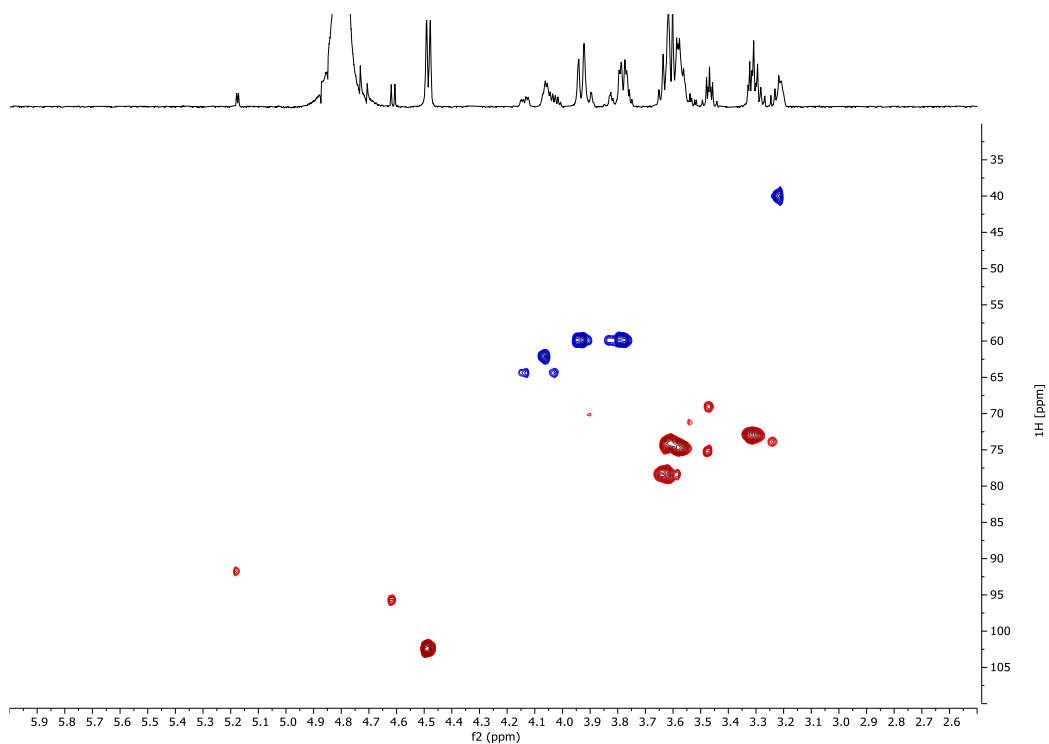

## 4.5 Synthesis of A<sub>3</sub>PA<sub>2</sub>

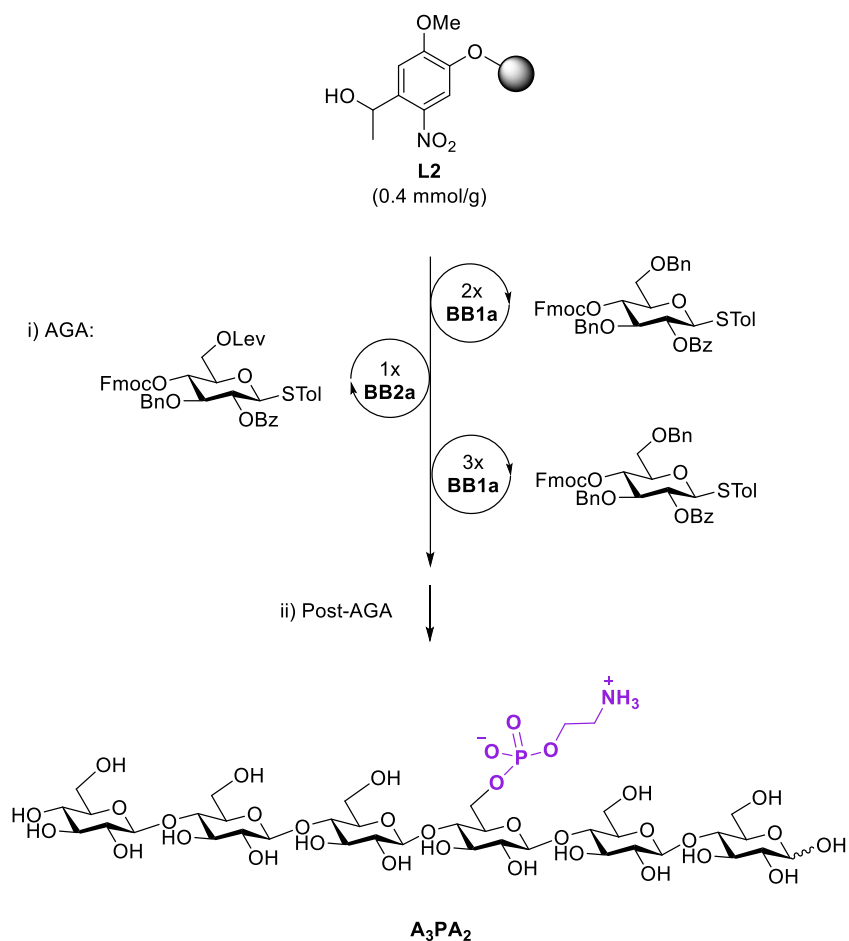

| Step     | Modules                        | Notes                                                                        |
|----------|--------------------------------|------------------------------------------------------------------------------|
| AGA      | <b>A</b>                       | <b>L2</b> swelling                                                           |
|          | <b>2 x BB1a</b><br><b>BB2a</b> | <b>B, C1, D, E1</b><br><b>C1:</b> (-20 °C for 5 min, 0 °C for 20 min)        |
|          | <b>3 x BB1a</b>                | <b>B, C1, D, E1, D, E2</b><br><b>C1:</b> (-20 °C for 5 min, 0 °C for 20 min) |
| Post-AGA | <b>Phosphorylation</b>         | <b>F</b>                                                                     |
|          | <b>Hydrolysis</b>              | <b>G</b>                                                                     |
|          | <b>Purification</b>            | <b>J</b>                                                                     |
|          | <b>Hydrogenolysis</b>          | <b>I</b>                                                                     |
|          | <b>Purification</b>            | <b>J</b>                                                                     |

Automated synthesis, global deprotection, and purification afforded **A<sub>3</sub>PA<sub>2</sub>** as white solid (0.7 mg, 5% overall yield).

$^1\text{H}$  NMR (400 MHz,  $\text{D}_2\text{O}$ )  $\delta$  5.19 (d,  $J = 4.0$  Hz, 0.4H, H1- $\alpha$ ), 4.63 (d,  $J = 8.4$  Hz, 0.6H, H1- $\beta$ ), 4.56 – 4.46 (m, 5H), 4.23 (dd,  $J = 12.4$  Hz, 4.4 Hz, 1H) 4.14 – 4.11 (br, 1H), 4.07 (q,  $J = 5.6$ , 2H), 3.96 – 3.52 (m, 30H), 3.49 – 3.43 (m, 2H), 3.40 – 3.22 (m, 7H), 3.18 (t,  $J = 4.8$  Hz, 2H).  $^{31}\text{P}$  NMR (162 MHz,  $\text{D}_2\text{O}$ )  $\delta$  0.09. HRMS (QToF)  $m/z$  1114.346  $[\text{M}+\text{H}]^+$  ( $\text{C}_{38}\text{H}_{69}\text{NO}_{34}\text{P}$  requires 1114.343).

**RP-HPLC of  $\text{A}_3\text{PA}_2$  (ELSD trace, Method J5,  $t_{\text{R}} = 15.2, 15.5$  min)**

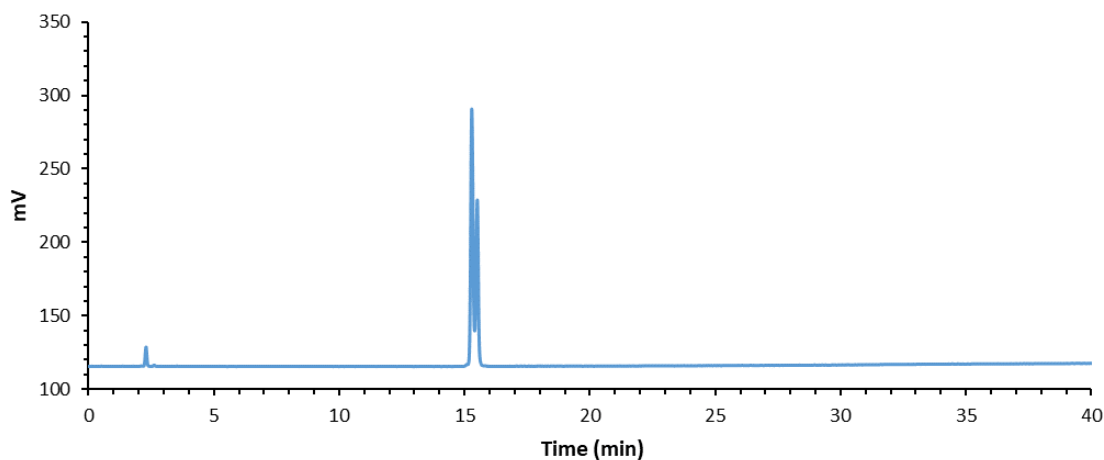

**$^1\text{H}$  NMR of  $\text{A}_3\text{PA}_2$  (400 MHz,  $\text{D}_2\text{O}$ )**

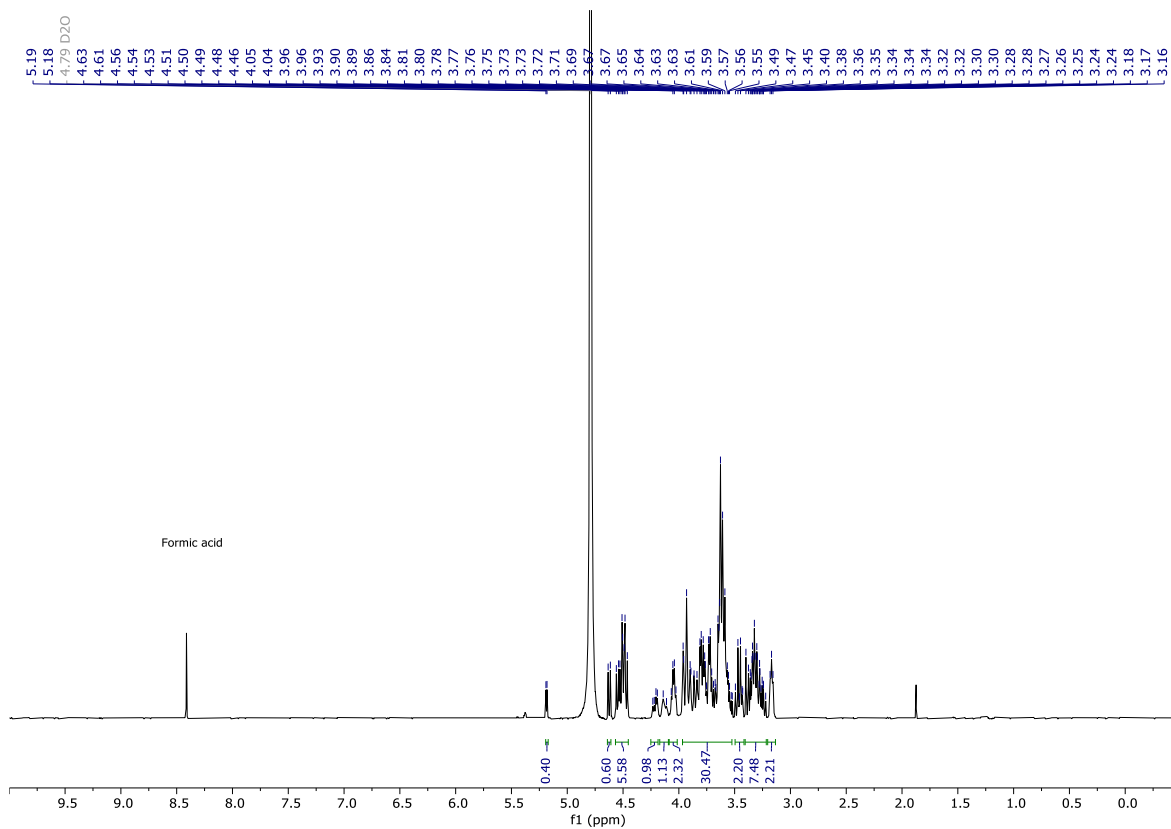

### $^{31}\text{P}$ NMR of $\text{A}_3\text{PA}_2$ (162 MHz, $\text{D}_2\text{O}$ )

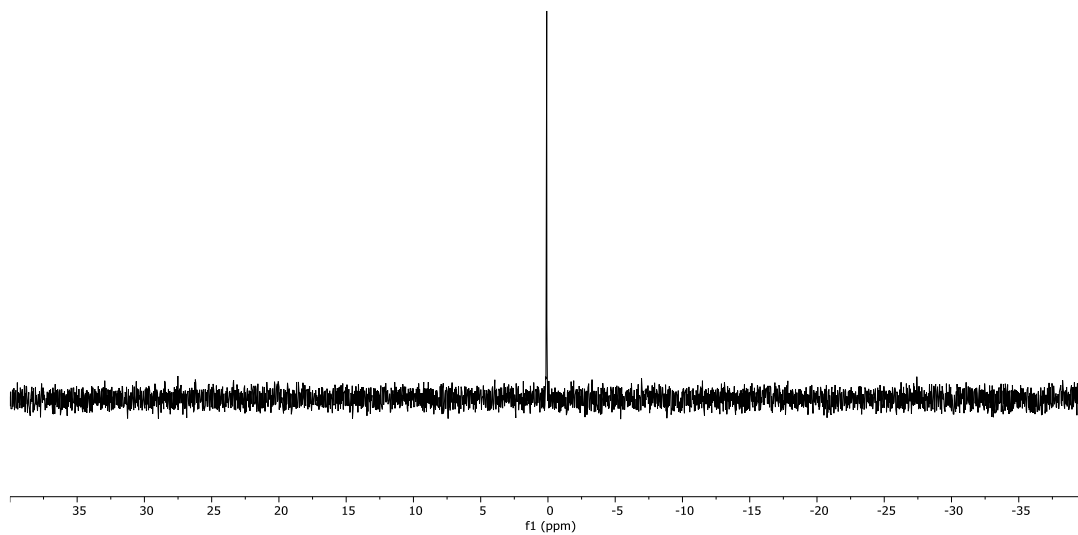

### HSQC NMR of $\text{A}_3\text{PA}_2$ ( $\text{D}_2\text{O}$ )

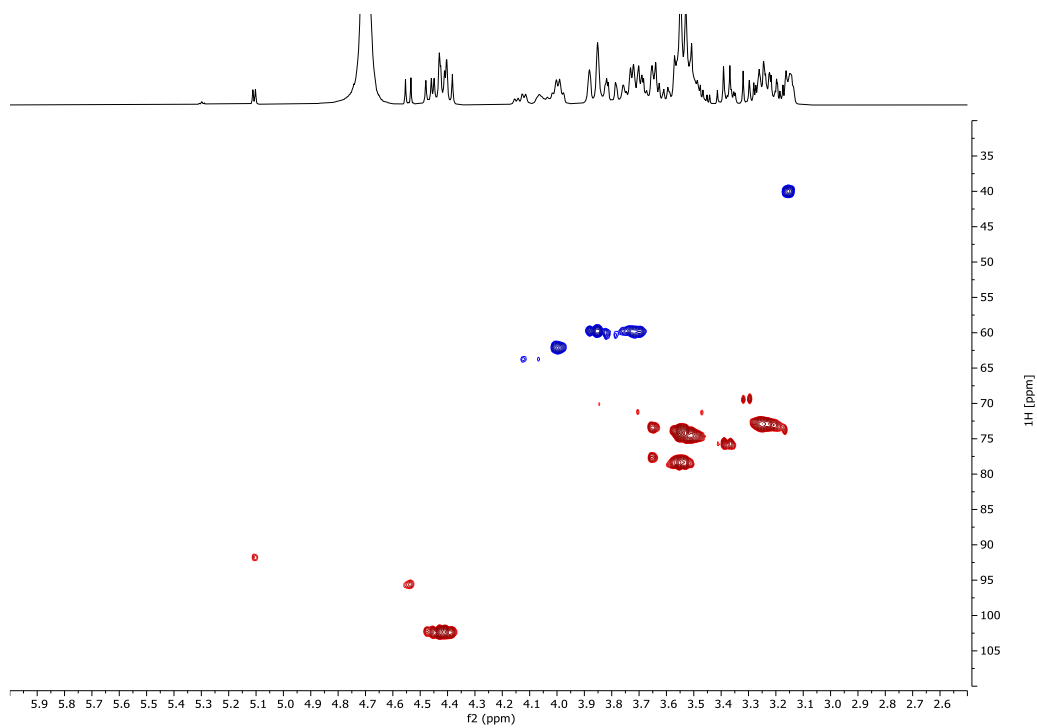

## 4.6 Synthesis of **APA<sub>4</sub>**

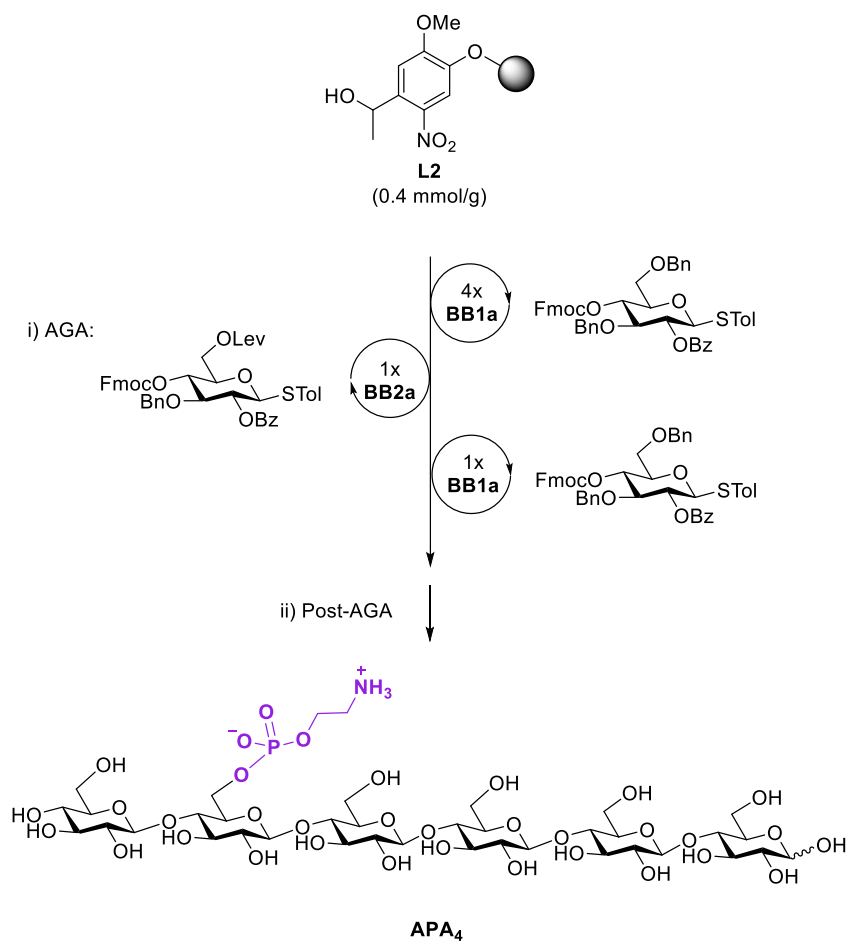

| Step     | Modules                | Notes                                                                        |
|----------|------------------------|------------------------------------------------------------------------------|
| AGA      | <b>A</b>               | <b>L2</b> swelling                                                           |
|          | <b>4 x BB1a</b>        | <b>B, C1, D, E1</b><br><b>C1:</b> (-20 °C for 5 min, 0 °C for 20 min)        |
|          | <b>BB2a</b>            | <b>B, C1, D, E1</b><br><b>C1:</b> (-20 °C for 5 min, 0 °C for 20 min)        |
| Post-AGA | <b>BB1a</b>            | <b>B, C1, D, E1, D, E2</b><br><b>C1:</b> (-20 °C for 5 min, 0 °C for 20 min) |
|          | <b>Phosphorylation</b> | <b>F</b>                                                                     |
|          | <b>Hydrolysis</b>      | <b>G</b><br><b>G:</b> (5 h)                                                  |
|          | <b>Purification</b>    | <b>J</b><br><b>J:</b> (Method J1)                                            |
|          | <b>Hydrogenolysis</b>  | <b>I</b><br><b>I:</b> (16 h)                                                 |
|          | <b>Purification</b>    | <b>J</b><br><b>J:</b> (Method J6: 16.0, 16.1 min)                            |

Automated synthesis, global deprotection, and purification afforded **APA<sub>4</sub>** as white solid (2.2 mg, 15% overall yield).

$^1\text{H}$  NMR (600 MHz,  $\text{D}_2\text{O}$ )  $\delta$  5.18 (d,  $J = 3.6$  Hz, 0.4H, H1- $\alpha$ ), 4.62 (d,  $J = 7.8$  Hz, 0.6H, H1- $\beta$ ), 4.52 – 4.48 (m, 5H), 4.22 (dd,  $J = 12$  Hz, 4.8 Hz, 1H) 4.12 – 4.10 (m, 1H), 4.04 – 4.01 (m, 2H), 3.94 – 3.86 (m, 5H), 3.83 – 3.67 (m, 8H), 3.65 – 3.52 (m, 11H), 3.49 – 3.44 (m, 2H), 3.38 – 3.30 (m, 4H), 3.26 – 3.22 (m, 2H), 3.14 (t,  $J = 4.8$  Hz, 2H),  $^{31}\text{P}$  NMR (243 MHz,  $\text{D}_2\text{O}$ )  $\delta$  0.10. HRMS (QToF)  $m/z$  1114.346  $[\text{M}+\text{H}]^+$  ( $\text{C}_{38}\text{H}_{69}\text{NO}_{34}\text{P}$  requires 1114.343).

**RP-HPLC of APA<sub>4</sub> (ELSD trace, Method J5,  $t_R = 15.4, 15.6$  min)**

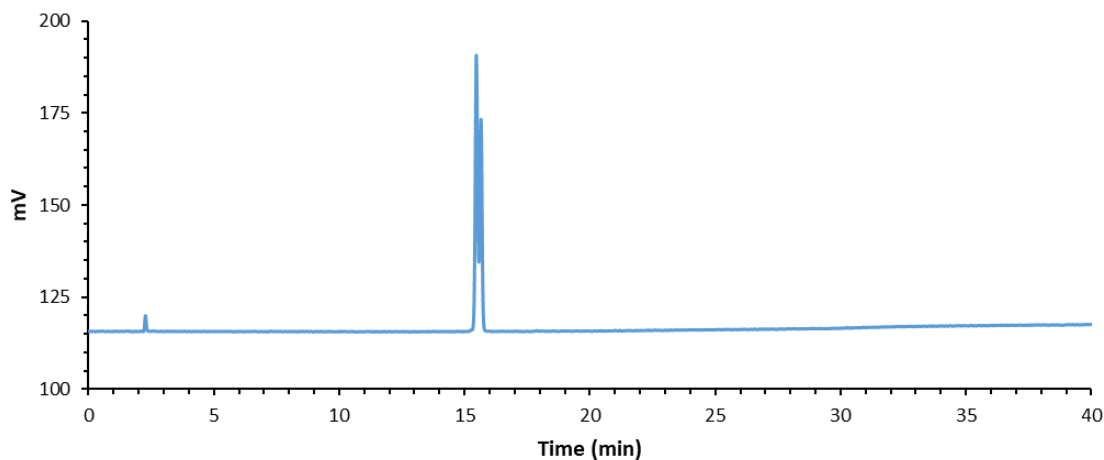

**$^1\text{H}$  NMR of APA<sub>4</sub> (600 MHz,  $\text{D}_2\text{O}$ )**

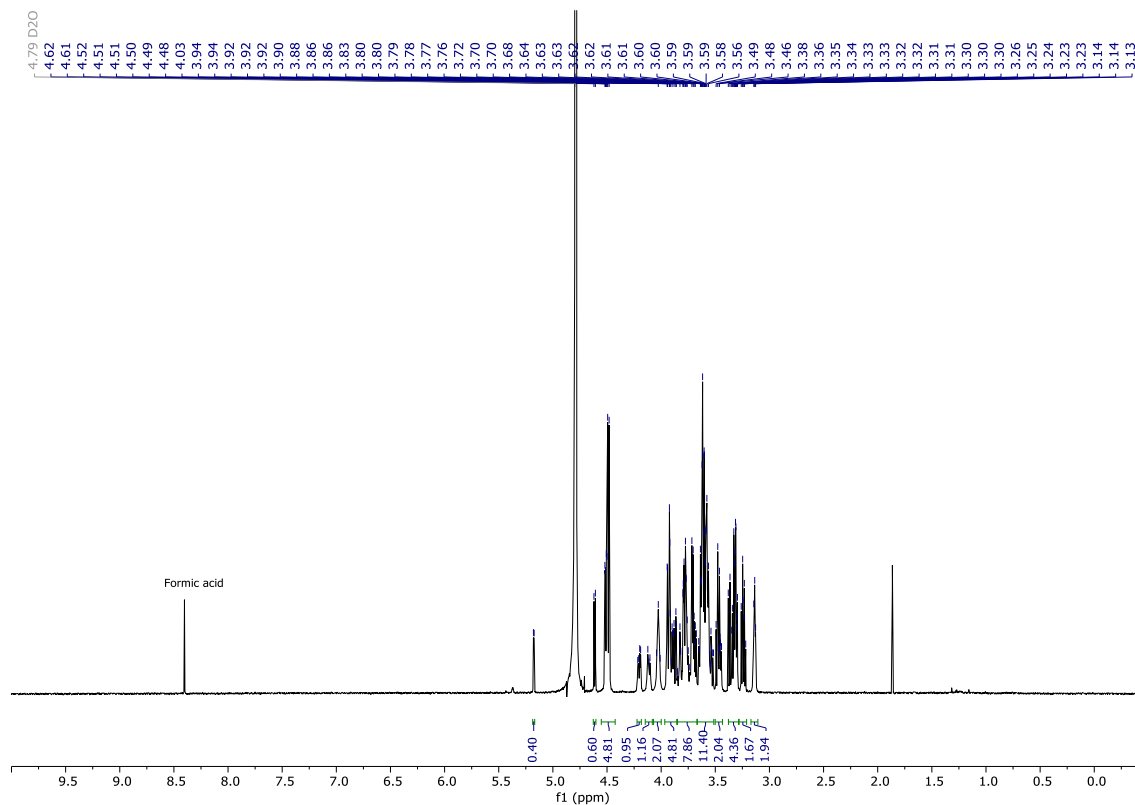



### $^{31}\text{P}$ NMR of APA<sub>4</sub> (243 MHz, D<sub>2</sub>O)

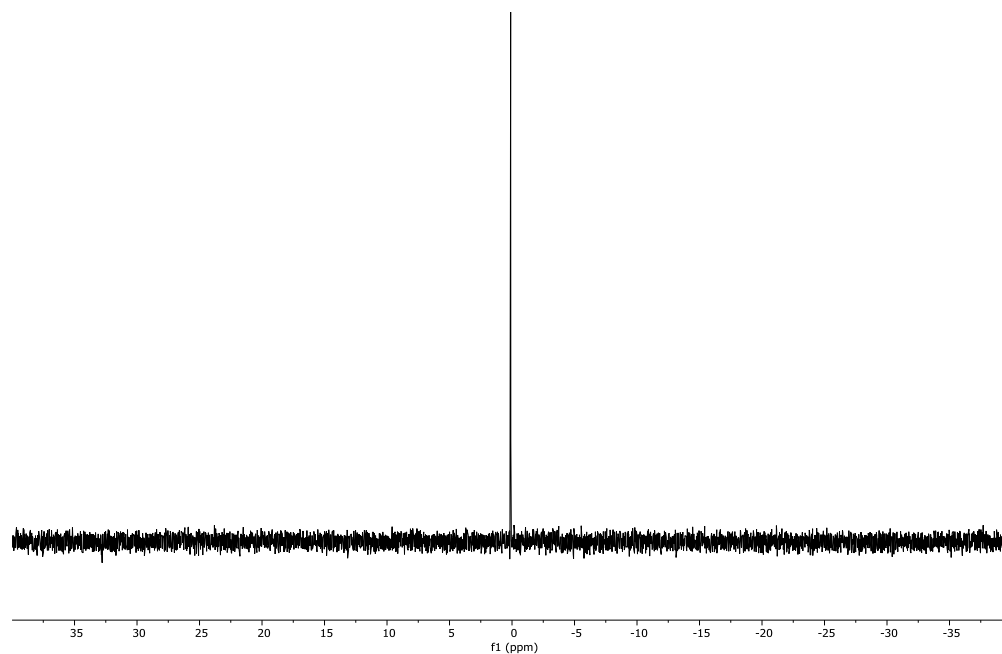

### HSQC NMR of APA<sub>4</sub> (D<sub>2</sub>O)

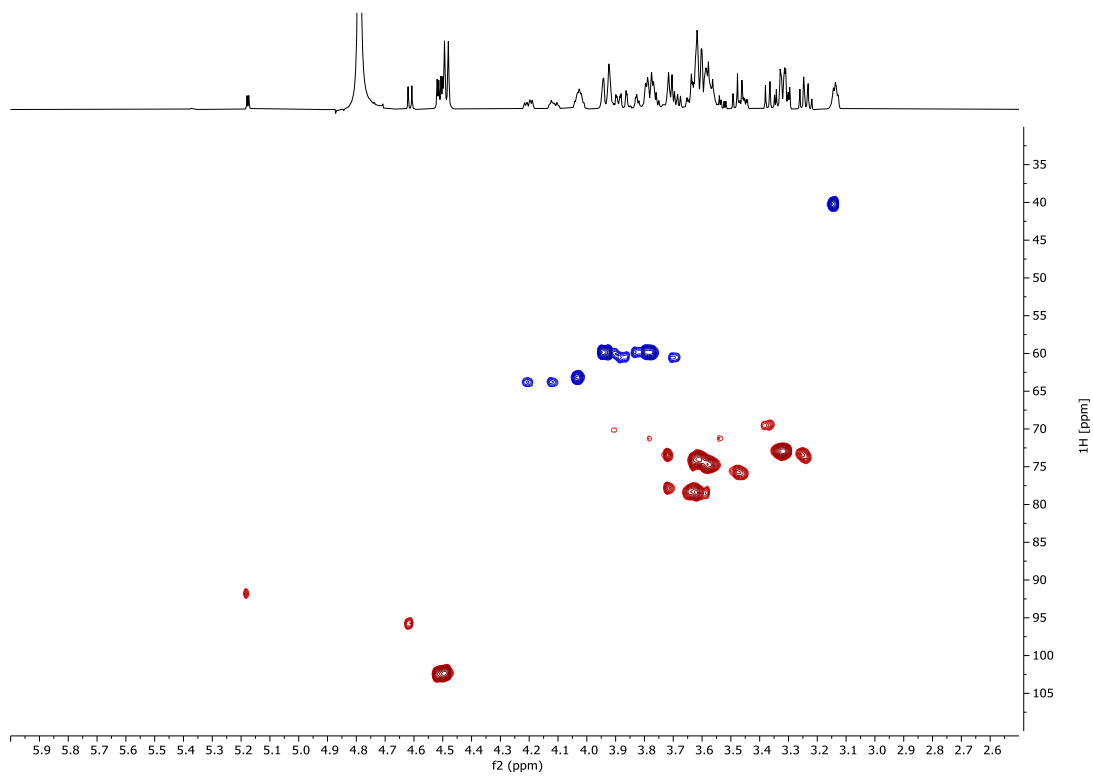

## 4.7 Synthesis of A<sub>5</sub>P

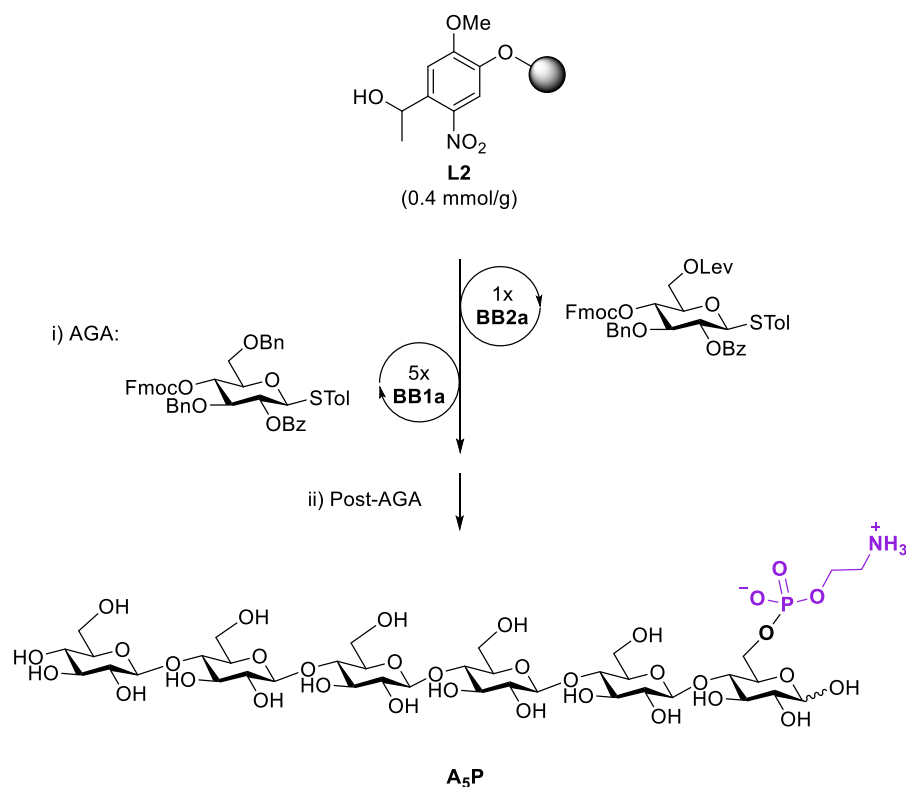

| Step     | Modules                | Notes                                                                        |
|----------|------------------------|------------------------------------------------------------------------------|
| AGA      | <b>A</b>               | <b>L2</b> swelling                                                           |
|          | <b>BB2a</b>            | <b>B, C1, D, E1</b><br><b>C1:</b> (-20 °C for 5 min, 0 °C for 20 min)        |
|          | <b>5 x BB1a</b>        | <b>B, C1, D, E1, D, E2</b><br><b>C1:</b> (-20 °C for 5 min, 0 °C for 20 min) |
| Post-AGA | <b>Phosphorylation</b> | <b>F</b>                                                                     |
|          | <b>Hydrolysis</b>      | <b>G</b><br><b>G:</b> (5 h)                                                  |
|          | <b>Purification</b>    | <b>J</b><br><b>J:</b> (Method J1)                                            |
|          | <b>Hydrogenolysis</b>  | <b>I</b><br><b>I:</b> (16 h)                                                 |
|          | <b>Purification</b>    | <b>J</b><br><b>J:</b> (Method J6: 15.0 min)                                  |

Automated synthesis, global deprotection, and purification afforded **A<sub>5</sub>P** as white solid (0.6 mg, 4% overall yield).

<sup>1</sup>H NMR (700 MHz, D<sub>2</sub>O) δ 5.18 (d, *J* = 3.5 Hz, 0.4H, H1-α), 4.64 (d, *J* = 7.7 Hz, 0.6H, H1-β), 4.55 – 4.54 (m, 1H), 4.49 (dd, *J* = 16.8 Hz, 7.7 Hz, 4H), 4.15 – 4.04 (m, 5H), 3.94 (d, *J* = 11.2 Hz, 4H), 3.87 (d, *J* = 12.6 Hz, 1H), 3.79 (dd, *J* = 13.3 Hz, 4.9 Hz, 5H), 3.70 – 3.53 (m, 18H), 3.47 – 3.42 (m, 2H), 3.38 (t, *J* = 9.1 Hz, 1H), 3.32 – 3.24 (m, 6H), 3.16 – 3.15 (br, 2H), <sup>31</sup>P NMR (162 MHz, D<sub>2</sub>O) δ 0.18, 0.12. HRMS (QToF) *m/z* 1114.343 [M+H]<sup>+</sup> (C<sub>38</sub>H<sub>69</sub>NO<sub>34</sub>P requires 1114.343).

RP-HPLC of A<sub>5</sub>P (ELSD trace, Method J5, t<sub>R</sub> = 15.1, 15.2 min)

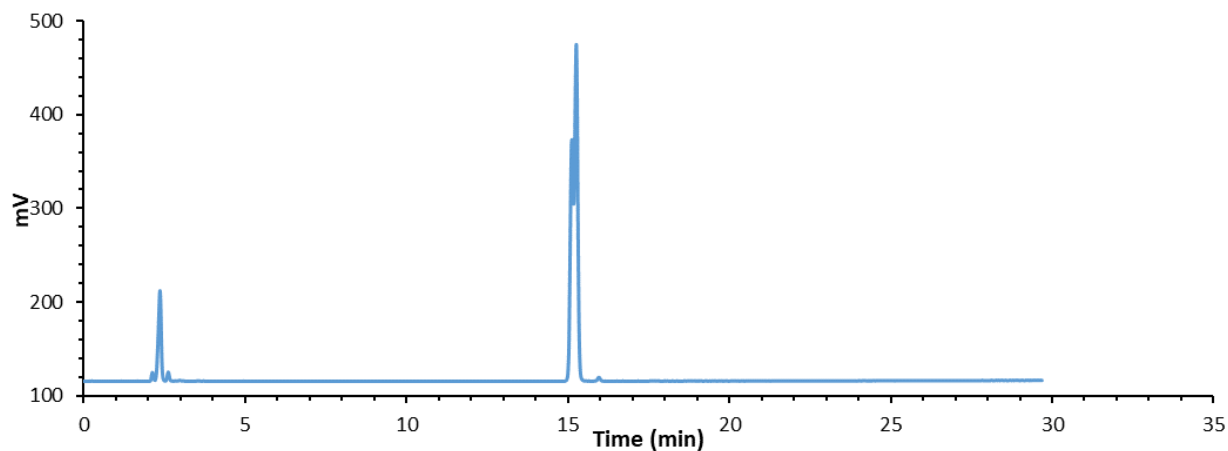

<sup>1</sup>H NMR of A<sub>5</sub>P (700 MHz, D<sub>2</sub>O)

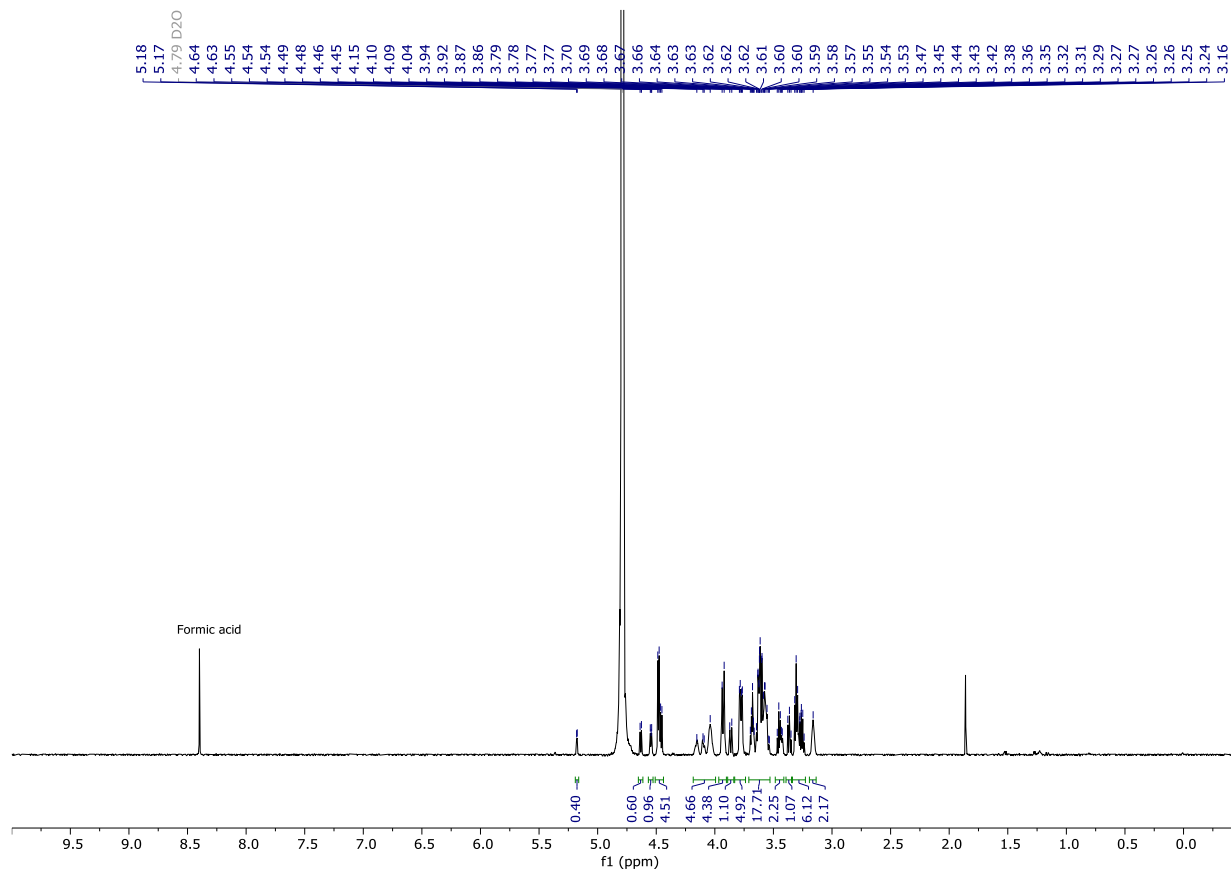

### $^{31}\text{P}$ NMR of $\text{A}_5\text{P}$ (162 MHz, $\text{D}_2\text{O}$ )

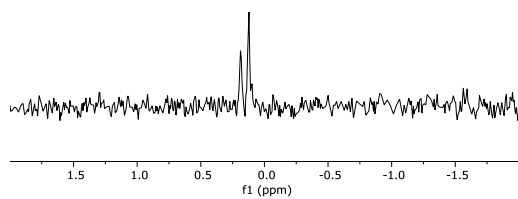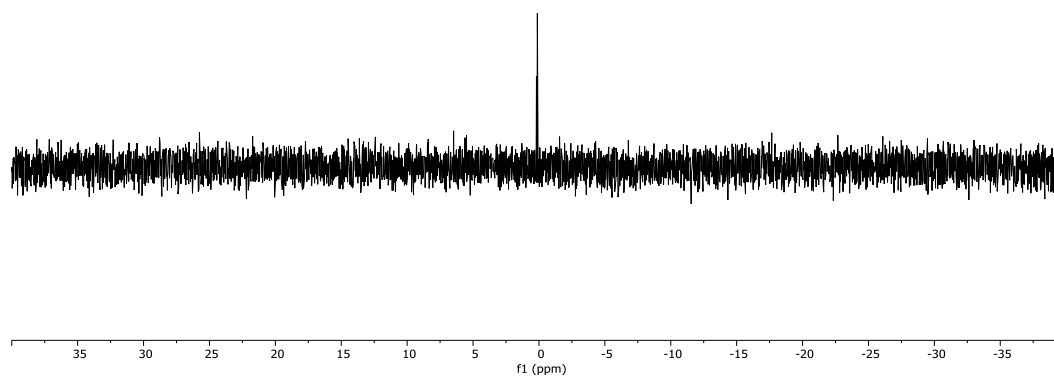

### HSQC NMR of $\text{A}_5\text{P}$ ( $\text{D}_2\text{O}$ )

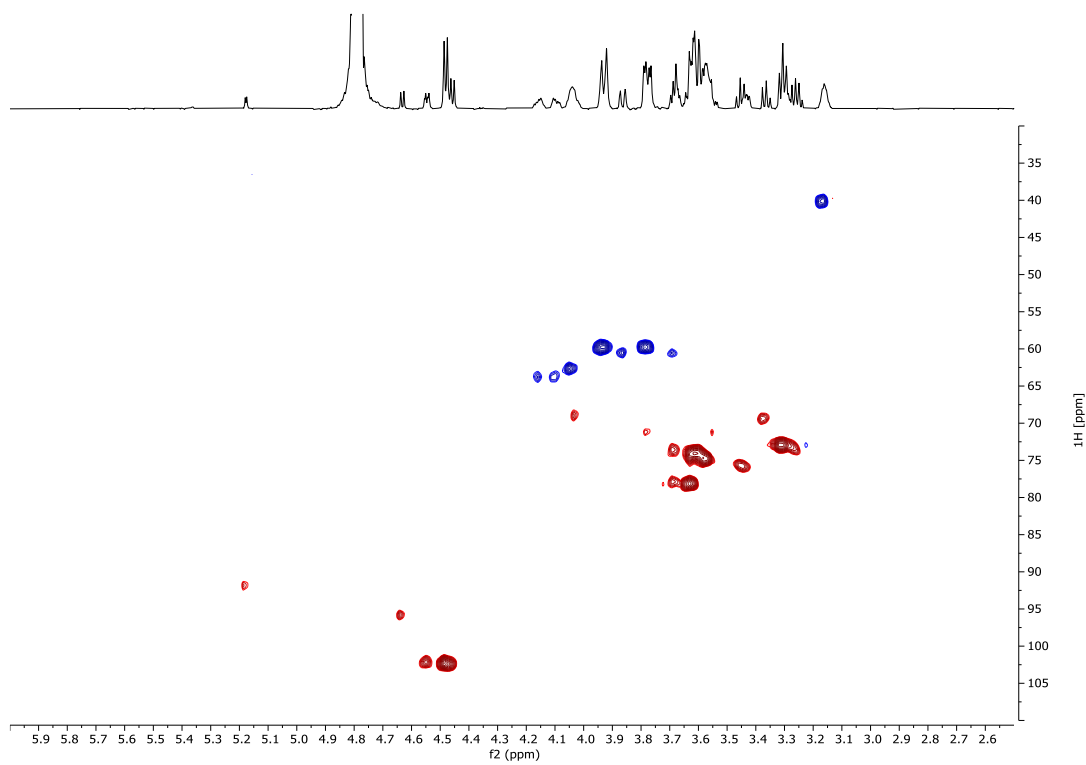

## 4.8 Synthesis of $A_2PA_3$

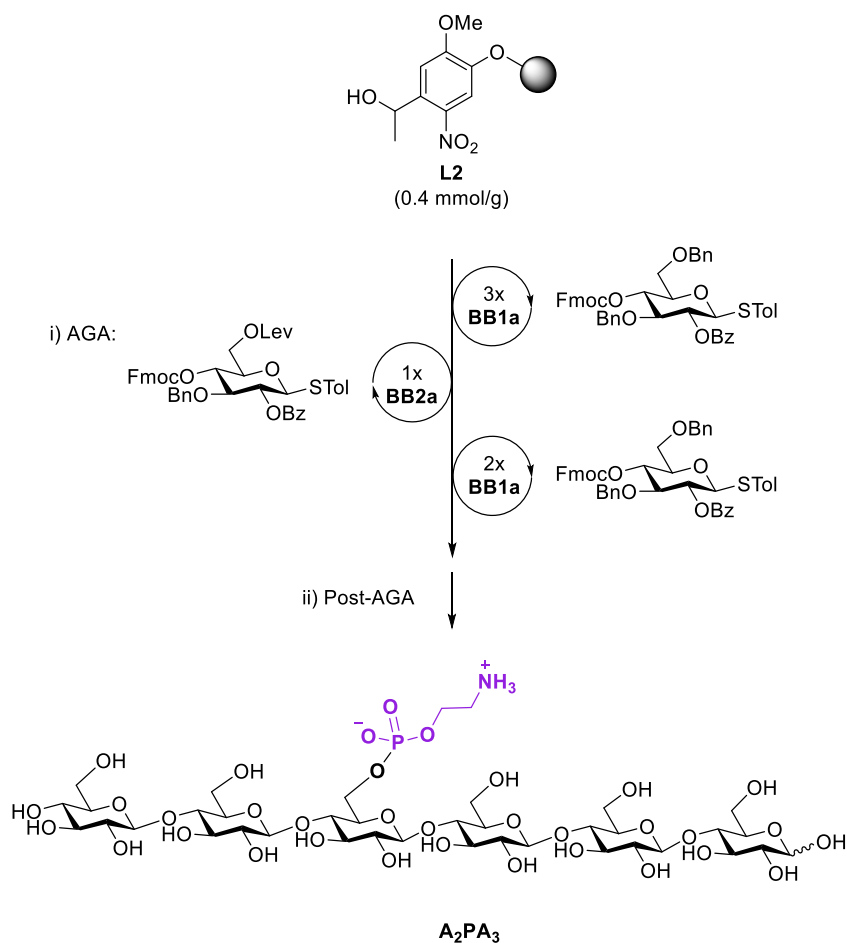

| Step     | Modules                        | Notes                                                                                                                                                                            |
|----------|--------------------------------|----------------------------------------------------------------------------------------------------------------------------------------------------------------------------------|
| AGA      | <b>A</b>                       | <b>L2</b> swelling                                                                                                                                                               |
|          | 2 x <b>BB1a</b><br><b>BB2a</b> | <b>B, C1, D, E1</b><br><b>B, C1, D, E1</b>                                                                                                                                       |
|          | 3 x <b>BB1a</b>                | <b>B, C1, D, E1, D, E2</b><br><b>C1: (-20 °C for 5 min, 0 °C for 20 min)</b><br><b>C1: (-20 °C for 5 min, 0 °C for 20 min)</b><br><b>C1: (-20 °C for 5 min, 0 °C for 20 min)</b> |
| Post-AGA | <b>Phosphorylation</b>         | <b>F</b>                                                                                                                                                                         |
|          | <b>Hydrolysis</b>              | <b>G</b>                                                                                                                                                                         |
|          | <b>Purification</b>            | <b>J</b>                                                                                                                                                                         |
|          | <b>Hydrogenolysis</b>          | <b>I</b>                                                                                                                                                                         |
|          | <b>Purification</b>            | <b>J</b>                                                                                                                                                                         |

Automated synthesis, global deprotection, and purification afforded  $A_2PA_3$  as white solid (0.4 mg, 3% overall yield).

$^1\text{H}$  NMR (600 MHz,  $\text{D}_2\text{O}$ )  $\delta$  5.19 (d,  $J = 5.4$  Hz, 0.4H, H1- $\alpha$ ), 4.63 (d,  $J = 12$  Hz, 0.6H, H1- $\beta$ ), 4.55 – 4.46 (m, 5H), 4.23 (dd,  $J = 15.6$  Hz, 7.8 Hz, 1H), 4.14 – 4.06 (m, 3H), 3.96 – 3.89 (m, 5H), 3.86 – 3.52 (m, 24H), 3.49 – 3.42 (m, 2H), 3.39 – 3.22 (m, 10H),  $^{31}\text{P}$  NMR (243 MHz,  $\text{D}_2\text{O}$ )  $\delta$  0.04. HRMS (QToF)  $m/z$  1114.351  $[\text{M}+\text{H}]^+$  ( $\text{C}_{38}\text{H}_{69}\text{NO}_{34}\text{P}$  requires 1114.343).

**RP-HPLC of  $\text{A}_2\text{PA}_3$  (ELSD trace, Method J5,  $t_{\text{R}} = 14.8$  min)**

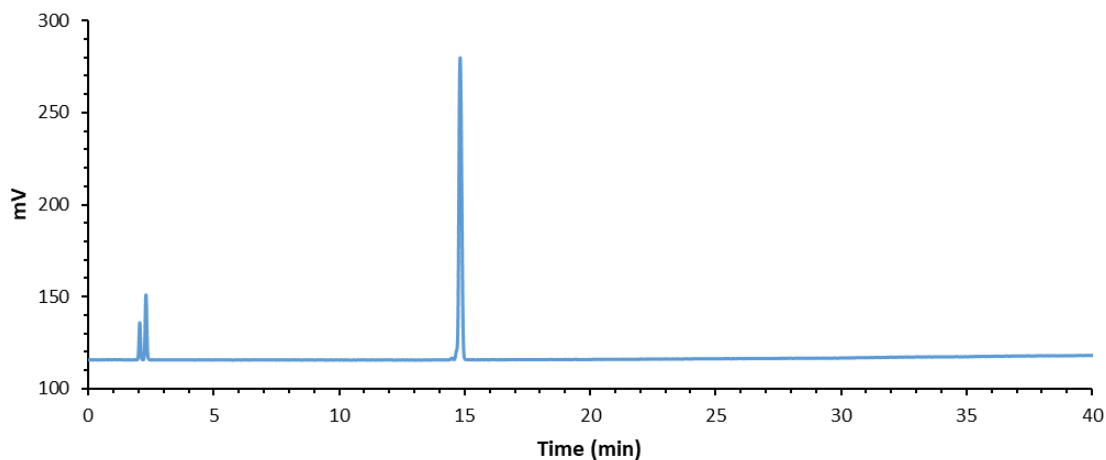

**$^1\text{H}$  NMR of  $\text{A}_2\text{PA}_3$  (600 MHz,  $\text{D}_2\text{O}$ )**

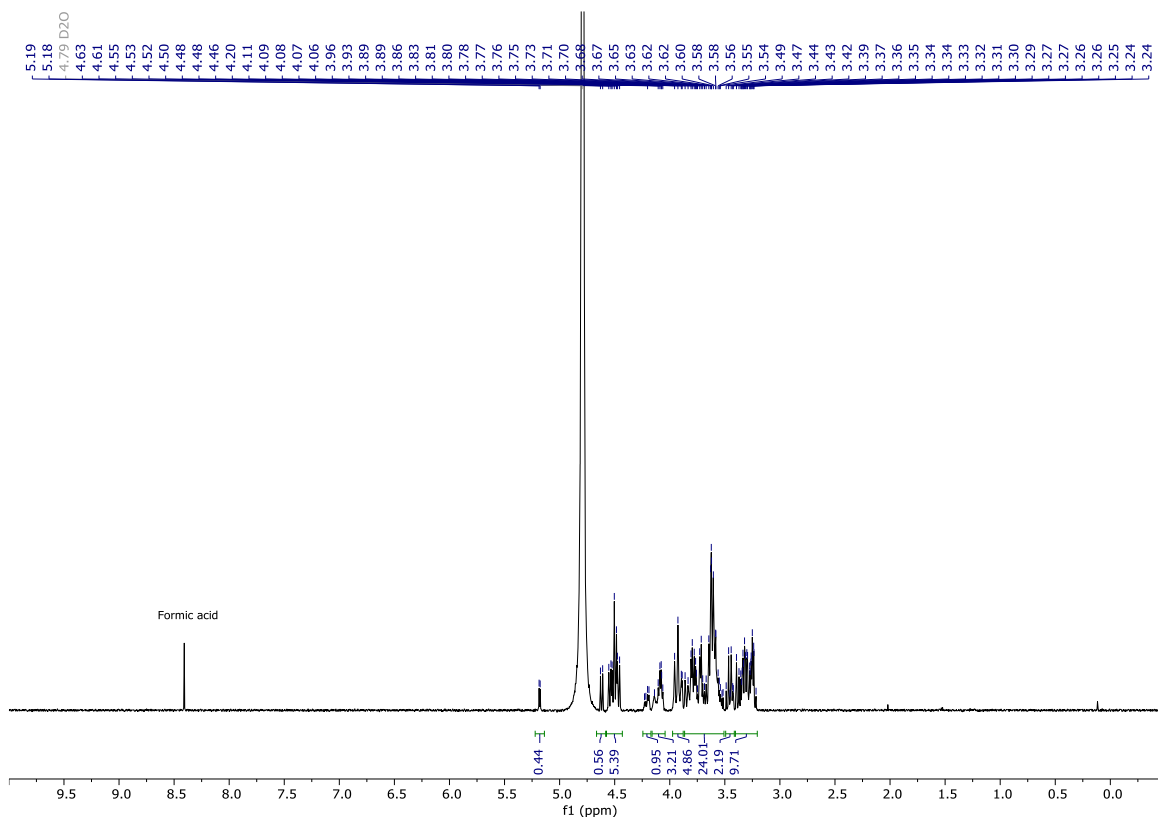

$^{31}\text{P}$  NMR of  $\text{A}_2\text{PA}_3$  (243 MHz,  $\text{D}_2\text{O}$ )

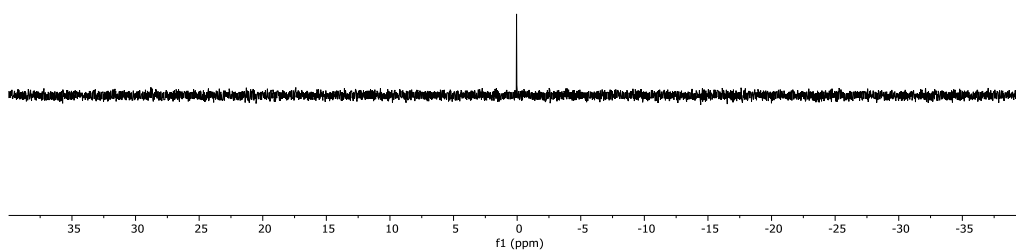

HSQC NMR of  $\text{A}_2\text{PA}_3$  ( $\text{D}_2\text{O}$ )

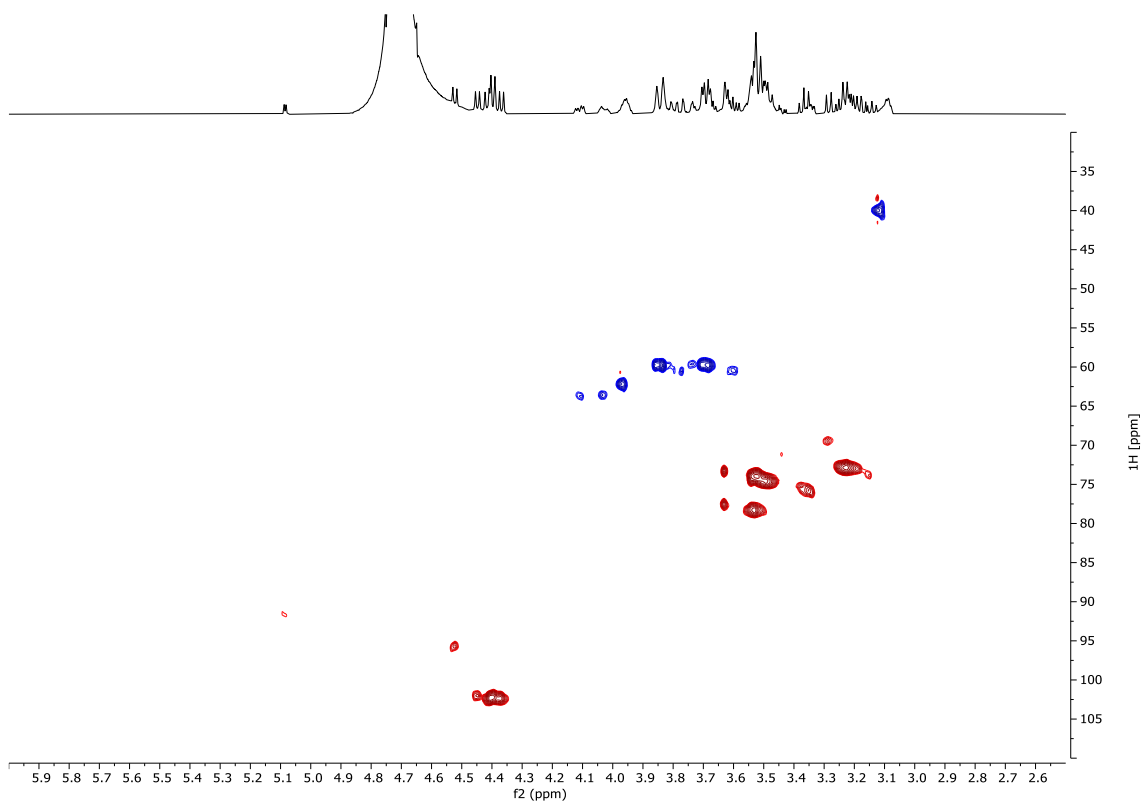

## 4.9 Synthesis of APA<sub>2</sub>PA

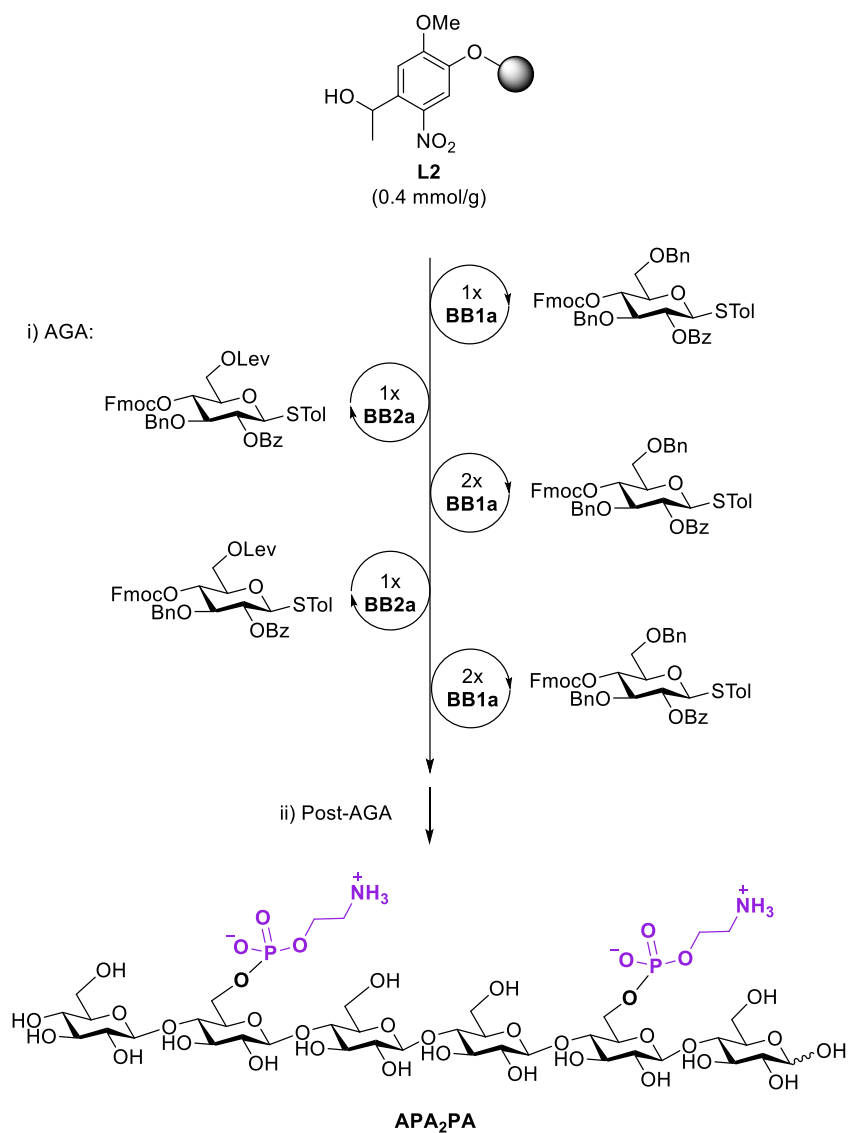

| Step     | Modules                | Notes                                                                     |
|----------|------------------------|---------------------------------------------------------------------------|
| AGA      | <b>A</b>               | <b>L2</b> swelling                                                        |
|          | <b>BB1a</b>            | <b>B, C1, D, E1</b> <b>C1:</b> (-20 °C for 5 min, 0 °C for 20 min)        |
|          | <b>BB2a</b>            | <b>B, C1, D, E1</b> <b>C1:</b> (-20 °C for 5 min, 0 °C for 20 min)        |
|          | <b>2 x BB1a</b>        | <b>B, C1, D, E1</b> <b>C1:</b> (-20 °C for 5 min, 0 °C for 20 min)        |
|          | <b>BB2a</b>            | <b>B, C1, D, E1</b> <b>C1:</b> (-20 °C for 5 min, 0 °C for 20 min)        |
|          | <b>BB1a</b>            | <b>B, C1, D, E1, D, E2</b> <b>C1:</b> (-20 °C for 5 min, 0 °C for 20 min) |
| Post-AGA | <b>Phosphorylation</b> | <b>F</b>                                                                  |
|          | <b>Hydrolysis</b>      | <b>G</b> <b>G:</b> (22 h)                                                 |
|          | <b>Purification</b>    | <b>J</b> <b>J:</b> (Method J1)                                            |



|  |                       |          |                                 |
|--|-----------------------|----------|---------------------------------|
|  | <b>Hydrogenolysis</b> | <b>I</b> | <b>I: (20 h)</b>                |
|  | <b>Purification</b>   | <b>J</b> | <b>J: (Method J8: 16.5 min)</b> |

Automated synthesis, global deprotection, and purification afforded **APA<sub>2</sub>PA** as white solid (0.4 mg, 2% overall yield).

<sup>1</sup>H NMR (700 MHz, D<sub>2</sub>O) δ 5.18 (d, *J* = 3.6 Hz, 0.4H, H1-α), 4.62 (d, *J* = 6.6 Hz, 0.6H, H1-β), 4.55 – 4.48 (m, 6H), 4.20 – 4.19 (br, 2H), 4.12 – 4.10 (br, 2H), 3.99 – 3.87 (m, 8H), 3.79 – 3.46 (m, 26H), 3.38– 3.23 (m, 8H), 3.06 (s, 3H), <sup>31</sup>P NMR (162 MHz, D<sub>2</sub>O) δ 0.25. HRMS (QToF) *m/z* 1237.351 [M+H]<sup>+</sup> (C<sub>40</sub>H<sub>75</sub>NO<sub>37</sub>P<sub>2</sub> requires 1237.351).

**RP-HPLC of APA<sub>2</sub>PA (ELSD trace, Method J7, *t<sub>R</sub>* = 15.6 min)**

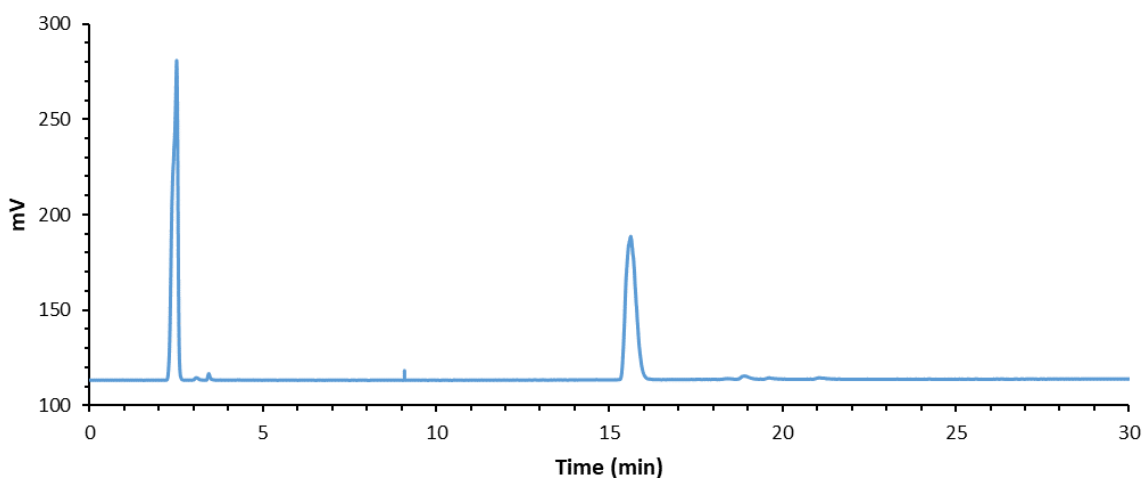

### $^1\text{H}$ NMR of APA<sub>2</sub>PA (600 MHz, D<sub>2</sub>O)

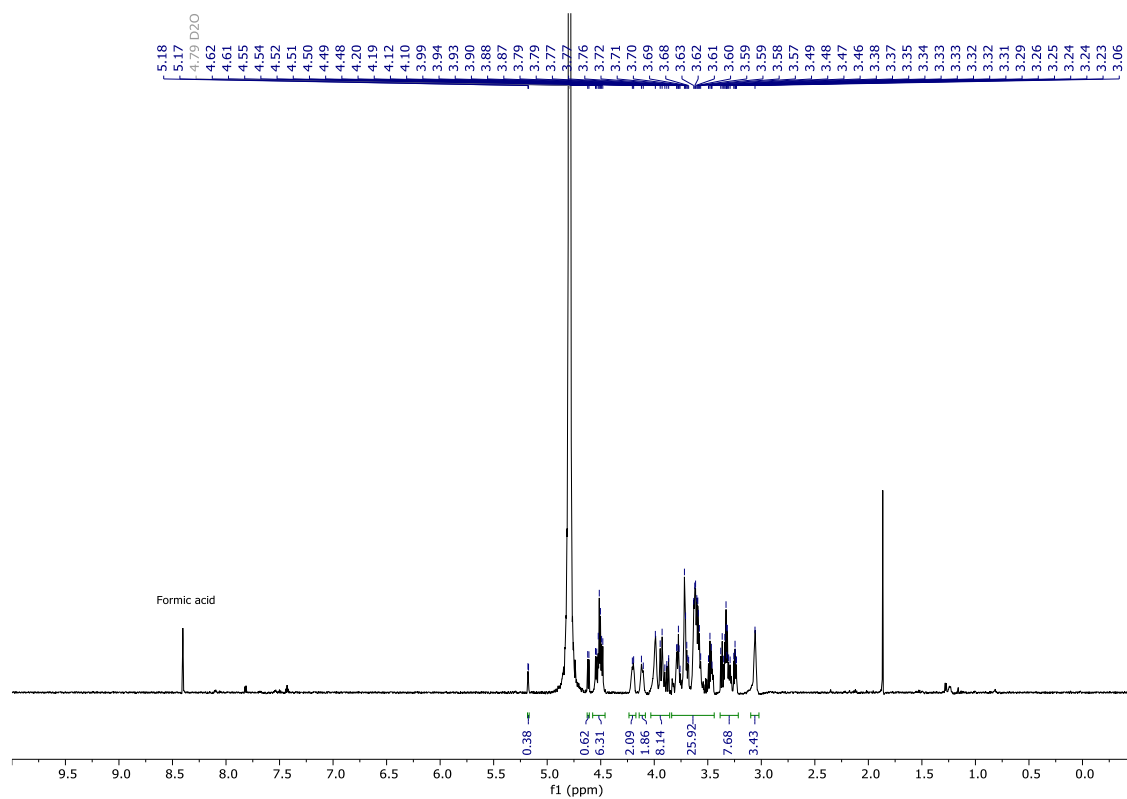

### $^{31}\text{P}$ NMR of APA<sub>2</sub>PA (162 MHz, D<sub>2</sub>O)

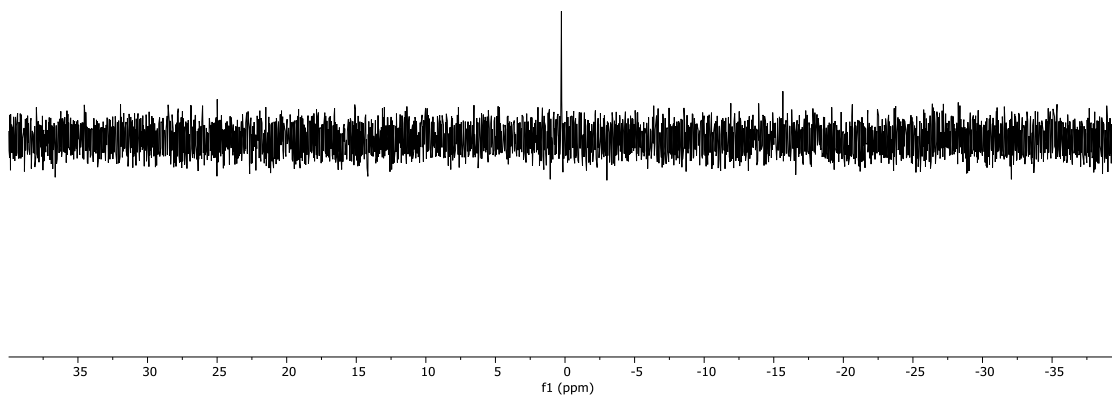

### HSQC NMR of APA<sub>2</sub>PA (D<sub>2</sub>O)

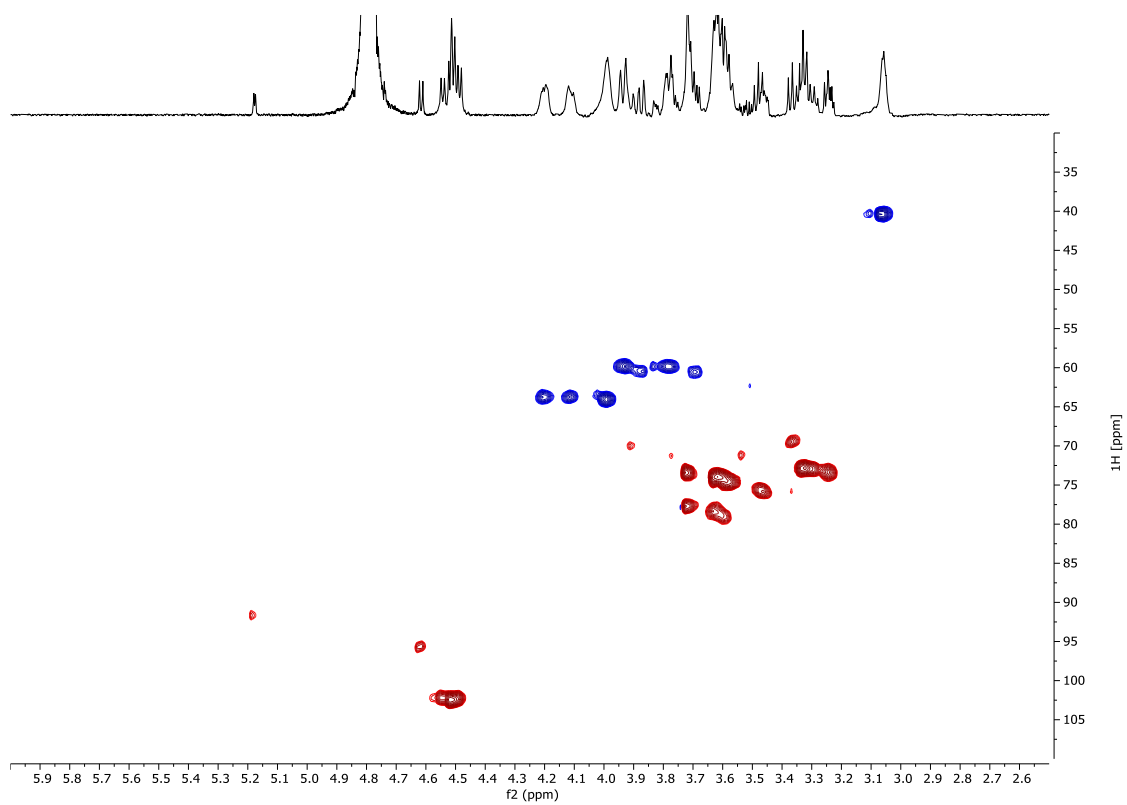

#### 4.10 Synthesis of APA<sub>3</sub>P

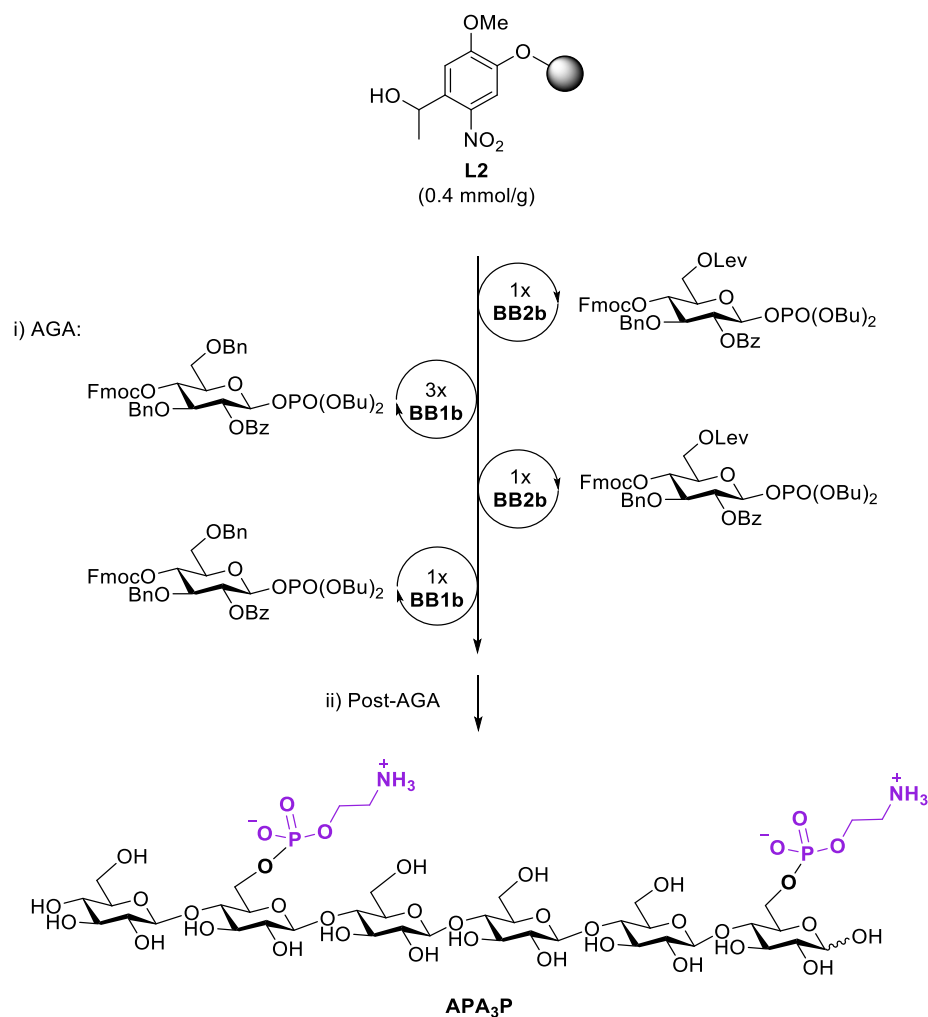

| Step     | Modules                | Notes                                                                          |
|----------|------------------------|--------------------------------------------------------------------------------|
| AGA      | <b>A</b>               | <b>L2</b> swelling                                                             |
|          | <b>BB2b</b>            | <b>B, C2, D, E1</b><br><b>C2:</b> (-30 °C for 5 min, -10 °C for 40 min)        |
|          | <b>3 x BB1b</b>        | <b>B, C2, D, E1</b><br><b>C2:</b> (-30 °C for 5 min, -10 °C for 40 min)        |
|          | <b>BB2b</b>            | <b>B, C2, D, E1</b><br><b>C2:</b> (-30 °C for 5 min, -10 °C for 40 min)        |
| Post-AGA | <b>BB1b</b>            | <b>B, C2, D, E1, D, E2</b><br><b>C2:</b> (-30 °C for 5 min, -10 °C for 40 min) |
|          | <b>Phosphorylation</b> | <b>F</b>                                                                       |
|          | <b>Hydrolysis</b>      | <b>G</b><br><b>G:</b> (4 h)                                                    |
|          | <b>Purification</b>    | <b>J</b><br><b>J:</b> (Method J1)                                              |
|          | <b>Hydrogenolysis</b>  | <b>I</b><br><b>I:</b> (20 h)                                                   |
|          | <b>Purification</b>    | <b>J</b><br><b>J:</b> (Method J8: 16.0 min)                                    |

Automated synthesis, global deprotection, and purification afforded **APA<sub>3</sub>P** as white solid (0.9 mg, 6% overall yield).

<sup>1</sup>H NMR (400 MHz, D<sub>2</sub>O) δ 5.21 (d, *J* = 3.6 Hz, 0.4H, H1-α), 4.67 (d, *J* = 7.6 Hz, 0.6H, H1-β), 4.58 – 4.50 (m, 5H), 4.23 – 4.10 (m, 8H) 3.97 – 3.88 (m, 3H) 3.82 – 3.55 (m, 19H), 3.52 – 3.46 (m, 2H), 3.41 – 3.25 (m, 11H), <sup>31</sup>P NMR (162 MHz, D<sub>2</sub>O) δ 0.01, -0.01, -0.04. HRMS (QToF) *m/z* 1237.354 [M+H]<sup>+</sup> (C<sub>40</sub>H<sub>75</sub>NO<sub>37</sub>P<sub>2</sub> requires 1237.351).

**RP-HPLC of APA<sub>3</sub>P (ELSD trace, Method J5, *t<sub>R</sub>* = 13.6, 13.7 min)**

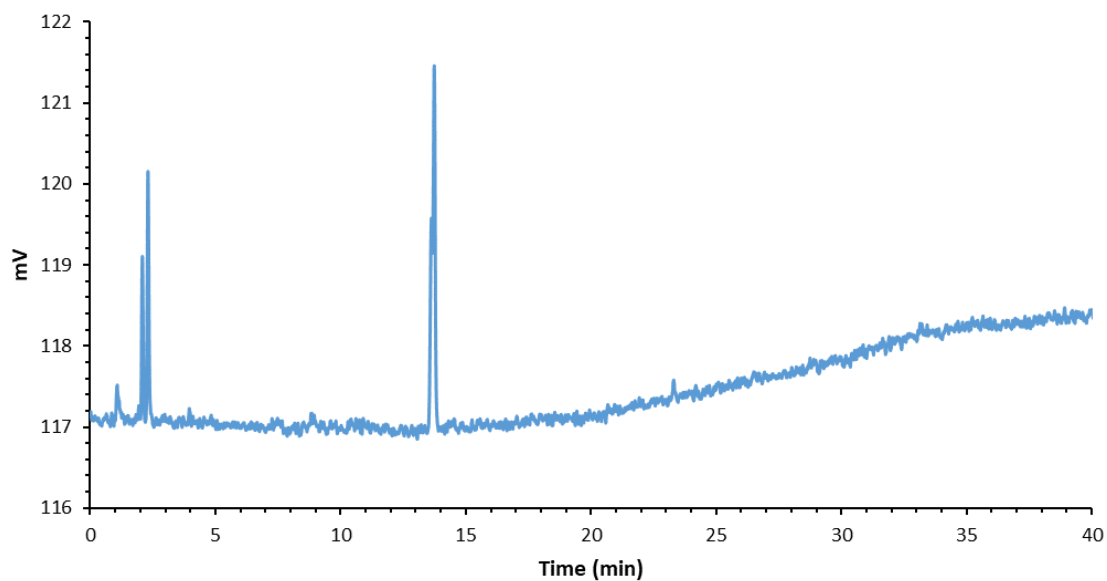

### $^1\text{H}$ NMR of APA<sub>3</sub>P (400 MHz, D<sub>2</sub>O)

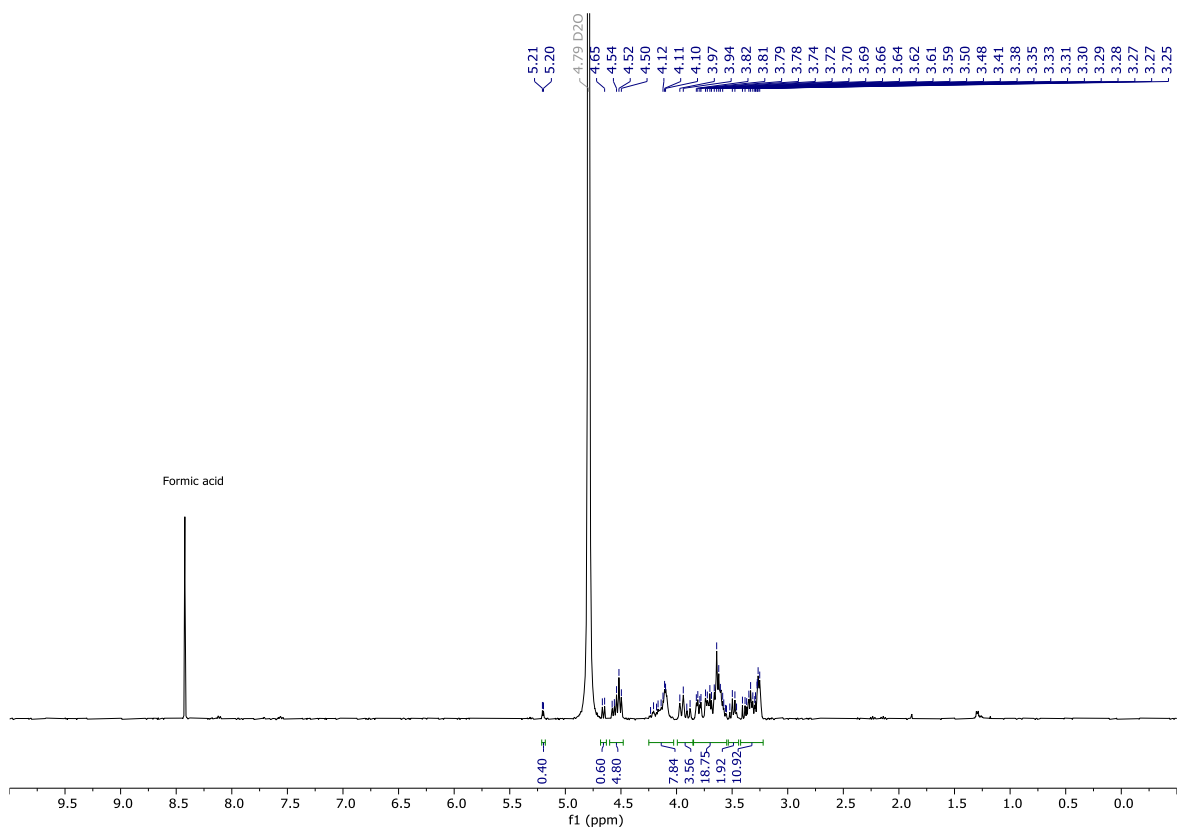

### $^{31}\text{P}$ NMR of APA<sub>3</sub>P (162 MHz, D<sub>2</sub>O)

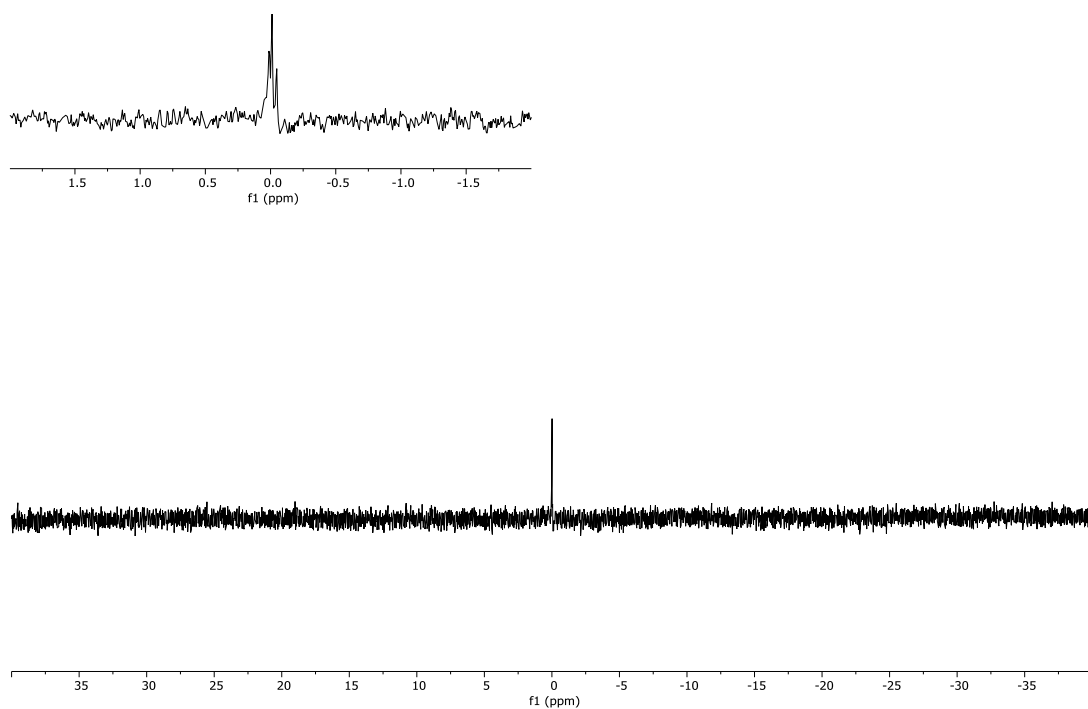

### HSQC NMR of APA<sub>3</sub>P (D<sub>2</sub>O)

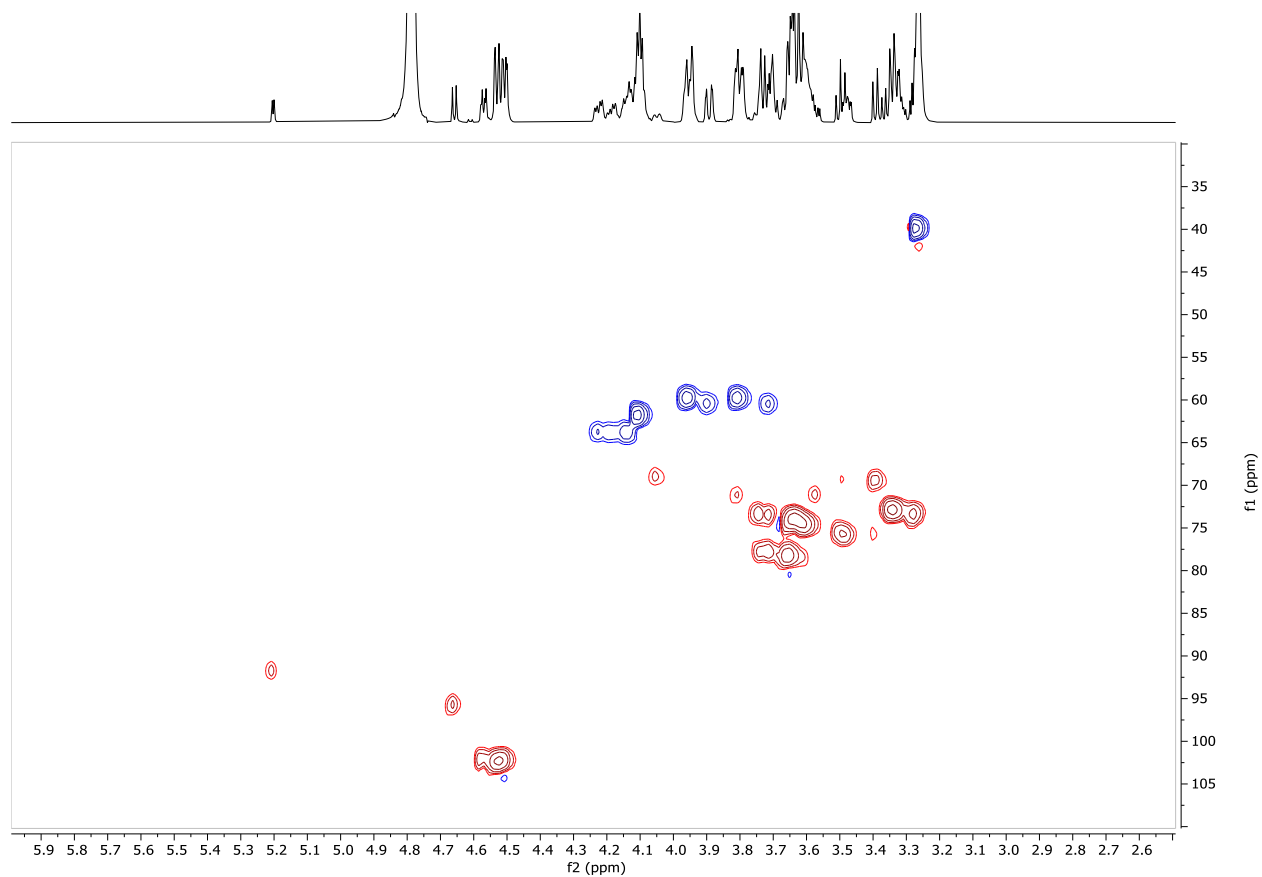

## 4.11 Synthesis of (AP)<sub>3</sub>

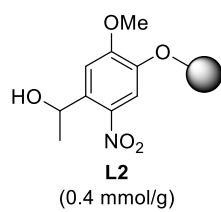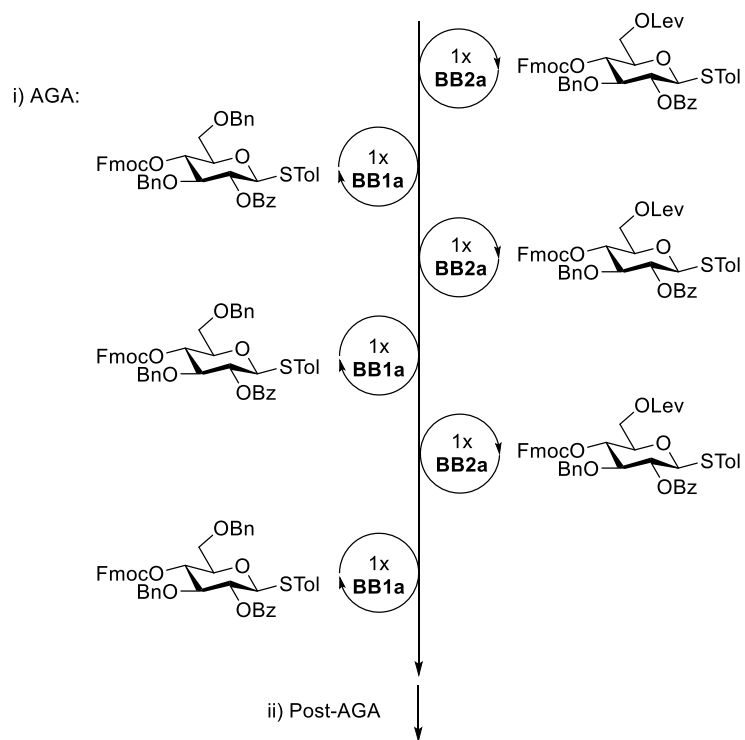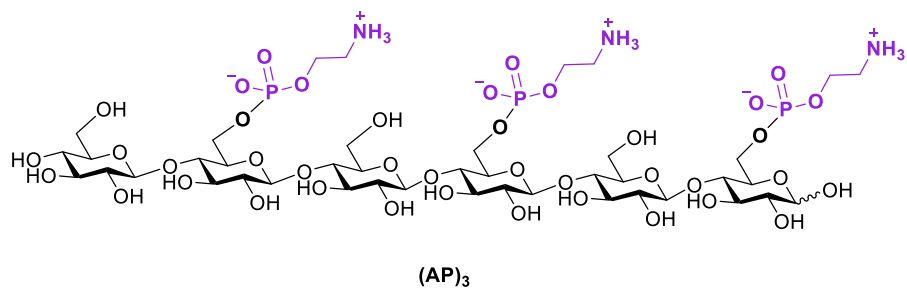



| Step     |                        | Modules             | Notes                                          |
|----------|------------------------|---------------------|------------------------------------------------|
| AGA      |                        | <b>A</b>            | <b>L2</b> swelling                             |
|          | <b>BB2a</b>            | <b>B, C1, D, E1</b> | <b>C1:</b> (-20 °C for 5 min, 0 °C for 20 min) |
|          | <b>BB1a</b>            | <b>B, C1, D, E1</b> | <b>C1:</b> (-20 °C for 5 min, 0 °C for 20 min) |
|          | <b>BB2a</b>            | <b>B, C1, D, E1</b> | <b>C1:</b> (-20 °C for 5 min, 0 °C for 20 min) |
|          | <b>BB1a</b>            | <b>B, C1, D, E1</b> | <b>C1:</b> (-20 °C for 5 min, 0 °C for 20 min) |
|          | <b>BB2a</b>            | <b>B, C1, D, E1</b> | <b>C1:</b> (-20 °C for 5 min, 0 °C for 20 min) |
| Post-AGA | <b>Phosphorylation</b> | <b>F</b>            |                                                |
|          | <b>Hydrolysis</b>      | <b>G</b>            | <b>G:</b> (4 h)                                |
|          | <b>Purification</b>    | <b>J</b>            | <b>J:</b> (Method J1)                          |
|          | <b>Hydrogenolysis</b>  | <b>I</b>            | <b>I:</b> (19 h)                               |
|          | <b>Purification</b>    | <b>J</b>            | <b>J:</b> (Method J6: 14.7 min)                |

Automated synthesis, global deprotection, and purification afforded **(AP)<sub>3</sub>** as white solid (0.9 mg, 7% overall yield).

<sup>1</sup>H NMR (700 MHz, D<sub>2</sub>O) δ, 5.16 (d, *J* = 3.5 Hz, 0.4H, H1-α), 4.62 (d, *J* = 7.7 Hz, 0.6H, H1-β), 4.54 – 4.47 (m, 5H), 4.19 – 4.00 (m, 14H) 3.92 (d, *J* = 14 Hz, 2H), 3.86 (d, *J* = 7 Hz, 1H), 3.77 – 3.42 (m, 23H), 3.35 – 3.14 (m, 14H), <sup>31</sup>P NMR (162 MHz, D<sub>2</sub>O) δ 0.08, 0.03. HRMS (QToF) *m/z* 1360.3546 [M+H]<sup>+</sup> (C<sub>42</sub>H<sub>81</sub>N<sub>3</sub>O<sub>40</sub>P<sub>3</sub> requires 1360.3604).

#### RP-HPLC of (AP)<sub>3</sub> (ELSD trace, Method J9, t<sub>R</sub> = 5.8 min)

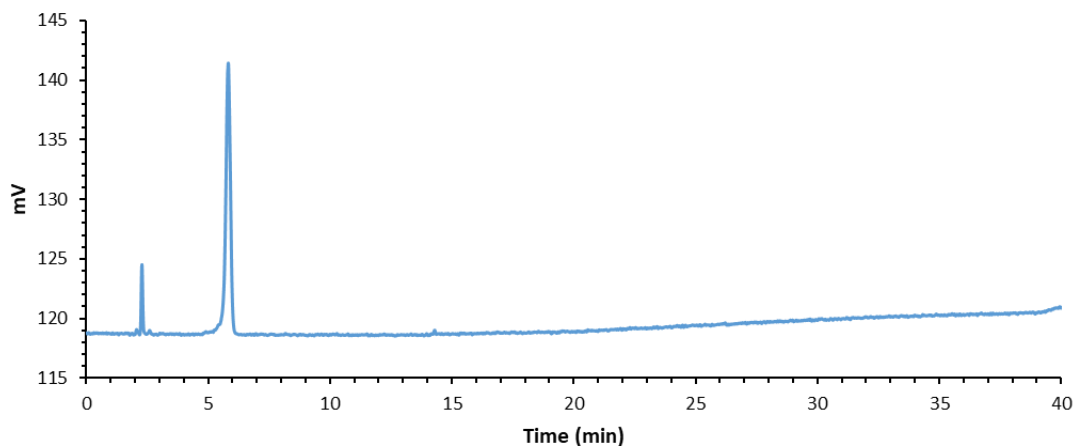

# $^1\text{H}$ NMR of $(\text{AP})_3$ (700 MHz, $\text{D}_2\text{O}$ )

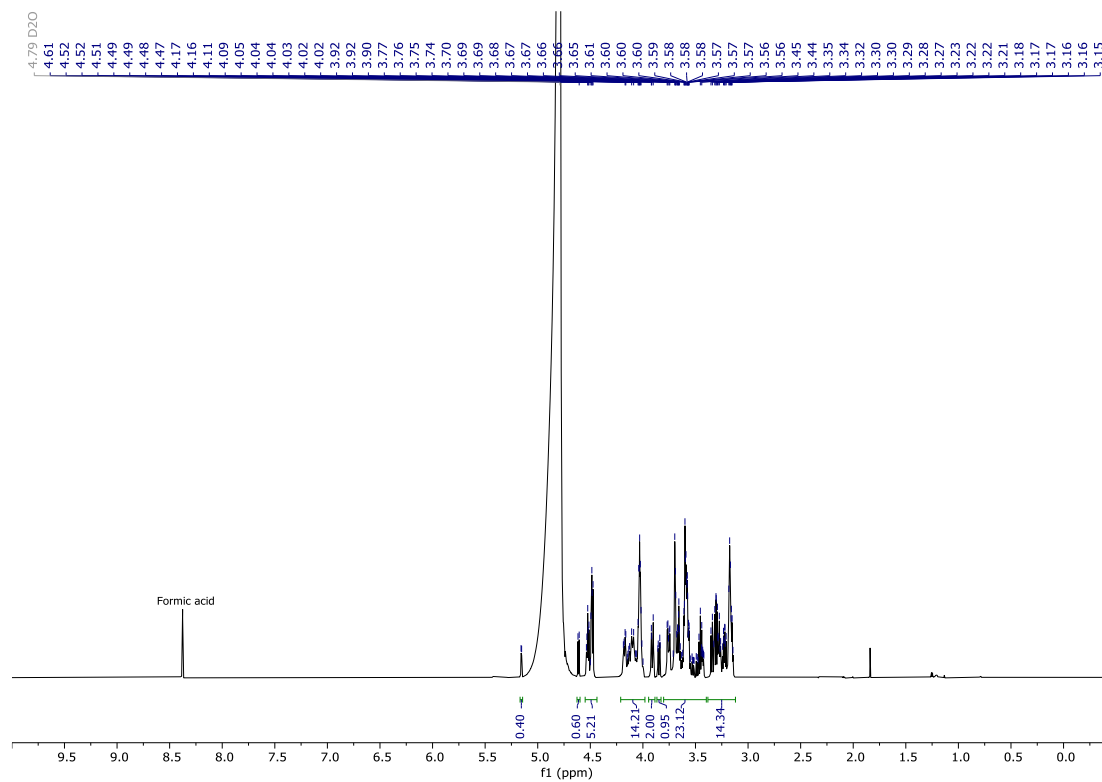

# $^{31}\text{P}$ NMR of $(\text{AP})_3$ (162 MHz, $\text{D}_2\text{O}$ )

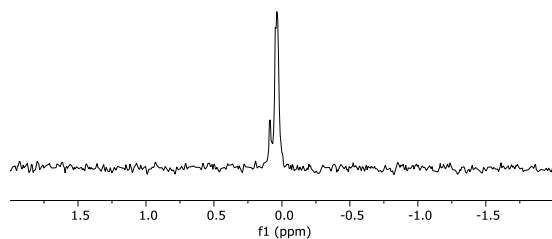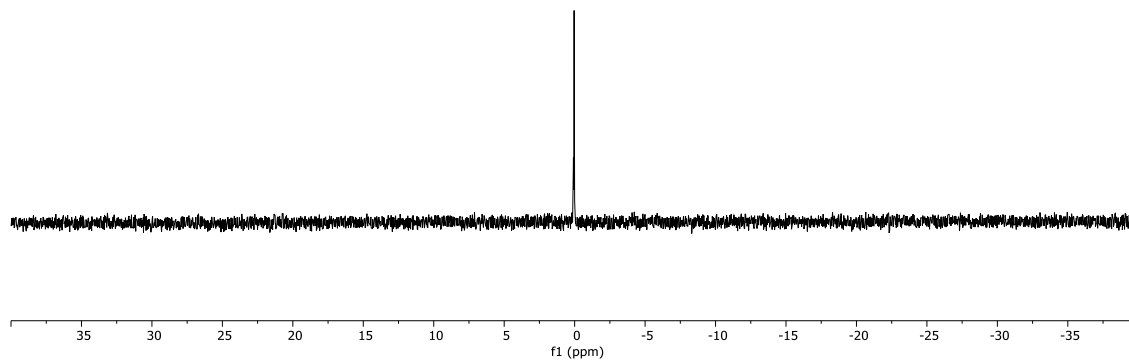

### HSQC NMR of (AP)<sub>3</sub> (D<sub>2</sub>O)

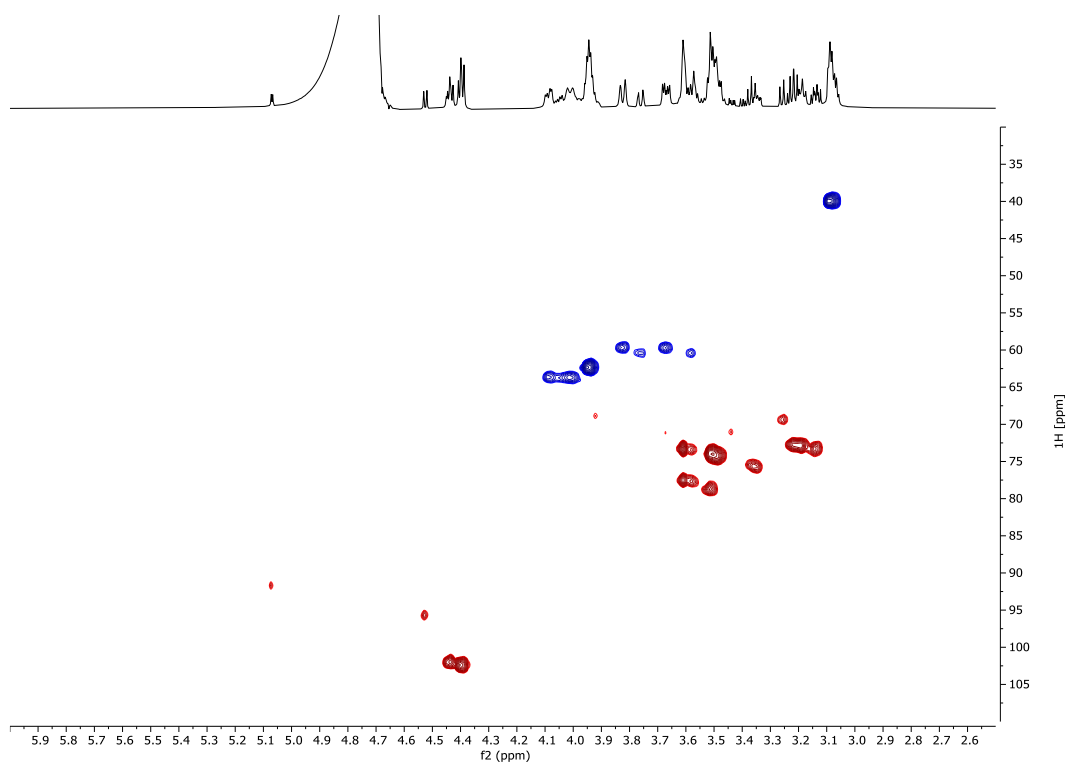

## 5. References

- (1) Eller, S.; Collot, M.; Yin, J.; Hahm, H. S.; Seeberger, P. H. Automated Solid-Phase Synthesis of Chondroitin Sulfate Glycosaminoglycans. *Angew. Chemie - Int. Ed.* **2013**, *52*, 5858–5861. <https://doi.org/10.1002/anie.201210132>.
- (2) Dallabernardina, P.; Schuhmacher, F.; Seeberger, P. H.; Pfrengle, F. Automated Glycan Assembly of Xyloglucan Oligosaccharides. *Org. Biomol. Chem.* **2016**, *14*, 309–313. <https://doi.org/10.1039/C5OB02226F>.
- (3) Tyrikos-Ergas, T.; Sletten, E. T.; Huang, J.-Y.; Seeberger, P. H.; Delbianco, M. On Resin Synthesis of Sulfated Oligosaccharides. *Chem. Sci.* **2022**, *13*, 2115–2120. <https://doi.org/10.1039/D1SC06063E>.
- (4) Le Mai Hoang, K.; Pardo-Vargas, A.; Zhu, Y.; Yu, Y.; Loria, M.; Delbianco, M.; Seeberger, P. H. Traceless Photolabile Linker Expedites the Chemical Synthesis of Complex Oligosaccharides by Automated Glycan Assembly. *J. Am. Chem. Soc.* **2019**, *141*, 9079–9086. <https://doi.org/10.1021/jacs.9b03769>.
- (5) Gude, M.; Ryf, J.; White, P. D. An Accurate Method for the Quantitation of Fmoc-Derivatized Solid Phase Supports. *Lett. Pept. Sci.* **2002**, *9*, 203–206. <https://doi.org/doi.org/10.1023/A:1024148619149>.
- (6) Tuck, O. T.; Sletten, E. T.; Danglad-Flores, J.; Seeberger, P. H. Towards a Systematic Understanding of the Influence of Temperature on Glycosylation Reactions. *Angew. Chemie Int. Ed.* **2022**, *202115433*. <https://doi.org/10.1002/anie.202115433>.
- (7) Tsai, Y. H.; Götze, S.; Vilotijevic, I.; Grube, M.; Silva, D. V.; Seeberger, P. H. A General and Convergent Synthesis of Diverse Glycosylphosphatidylinositol Glycolipids. *Chem. Sci.* **2013**, *4*, 468–481. <https://doi.org/10.1039/c2sc21515b>.
- (8) Campbell, A. S.; Fraser-Reid, B. Support Studies for Installing the Phosphodiester Residues of the Thy-1 Glycoprotein Membrane Anchor. *Bioorganic Med. Chem.* **1994**, *2*, 1209–1219. [https://doi.org/10.1016/S0968-0896\(00\)82072-6](https://doi.org/10.1016/S0968-0896(00)82072-6).
- (9) Hurevich, M.; Kandasamy, J.; Ponnappa, B. M.; Collot, M.; Kopetzki, D.; McQuade, D. T.; Seeberger, P. H. Continuous Photochemical Cleavage of Linkers for Solid-Phase Synthesis. *Org. Lett.* **2014**, *16*, 1794–1797. <https://doi.org/10.1021/ol500530q>.
- (10) Ohara, K.; Lin, C.-C.; Yang, P.-J.; Hung, W.-T.; Yang, W.-B.; Cheng, T.-J. R.; Fang, J.-M.; Wong, C.-H. Synthesis and Bioactivity of  $\beta$ -(1 $\rightarrow$ 4)-Linked Oligomannoses and Partially Acetylated Derivatives. *J. Org. Chem.* **2013**, *78*, 6390–6411. <https://doi.org/10.1021/jo4005266>.
- (11) Tyrikos-Ergas, T.; Gim, S.; Huang, J.; Pinzón Martín, S.; Varón Silva, D.; Seeberger, P. H.; Delbianco, M. Synthetic Phosphoethanolamine-Modified Oligosaccharides Reveal the Importance of Glycan Length and Substitution in Biofilm-Inspired Assemblies. *Nat. Commun.* **2022**, *13*, 3954–3961. <https://doi.org/10.1038/s41467-022-31633-5>.
